# Supplementary material for: An Improved Receptor-Based Pharmacophore Generation Algorithm Guided by Atomic Chemical Characteristics and Hybridization Types
Source: Front Pharmacol. 2018 Dec 17;9:1463. doi: 10.3389/fphar.2018.01463 (PMC6305075; doi:10.3389/fphar.2018.01463)
Supplement: Supplementary file 2 [file Table_2.XLSX]

## Sheet: our algorithm
ligands			decoys
Name	Fit Value		Name	Fit Value
ZINC03815441	4.09008		ZINC00026251	4.96718
ZINC03815440	3.6278		ZINC01507653	4.7343
ZINC03861549	3.6204		ZINC00454156	4.5783
ZINC02526173	3.3884		ZINC03969325	4.5747
ZINC02035359	3.2572		ZINC04414705	4.4202
ZINC03815438	3.2188		ZINC03851020	4.4004
ZINC03815443	3.1313		ZINC00003629	4.3784
ZINC03815449	3.1312		ZINC03201406	4.3782
ZINC03815444	2.997		ZINC02146360	4.3718
ZINC03812897	2.9922		ZINC03963807	4.2364
ZINC03815424	2.9922		ZINC04386723	4.2109
ZINC03815448	2.9905		ZINC04420150	4.2049
ZINC03815417	2.989		ZINC00474273	4.1329
ZINC00508310	2.9885		ZINC03852836	4.1074
ZINC03815429	2.9793		ZINC04131904	4.101
ZINC00155246	2.9788		ZINC00441501	4.076
ZINC03815428	2.9748		ZINC00536277	4.0705
ZINC00283101	2.9745		ZINC01464919	3.9283
ZINC03814415	2.9695		ZINC00227419	3.9119
ZINC01747889	2.9695		ZINC01140399	3.9113
ZINC03814419	2.9694		ZINC02739080	3.9049
ZINC01686128	2.9646		ZINC01404530	3.8794
ZINC02106113	2.9587		ZINC00073643	3.8367
ZINC03815435	2.9432		ZINC00002834	3.8075
ZINC02048444	2.9386		ZINC00043770	3.8072
ZINC03815437	2.8928		ZINC03648115	3.7979
ZINC03815446	2.8833		ZINC00043771	3.7655
ZINC01566834	2.8732		ZINC02650600	3.7515
ZINC03872293	2.8672		ZINC03868222	3.7467
ZINC01631270	2.8664		ZINC00021711	3.7299
ZINC01666991	2.8576		ZINC00083128	3.726
ZINC00056548	2.8568		ZINC00180621	3.7249
ZINC03815445	2.8566		ZINC00135905	3.6929
ZINC01999257	2.8479		ZINC00520224	3.6845
ZINC03815439	2.8412		ZINC03846353	3.6844
ZINC03814410	2.7592		ZINC00002831	3.6747
ZINC03815418	2.7098		ZINC03648136	3.6734
ZINC01668370	2.7079		ZINC00226062	3.67
ZINC03815432	2.6947		ZINC04498807	3.6518
ZINC03814364	2.6618		ZINC00543767	3.6504
ZINC03814416	2.6464		ZINC00022584	3.6447
ZINC03814412	2.6375		ZINC01076057	3.6373
ZINC00041692	2.6318		ZINC03858227	3.6301
ZINC03815442	2.5093		ZINC03648119	3.62
ZINC03814361	2.5015		ZINC01042169	3.6191
ZINC03815415	2.4705		ZINC03806773	3.6112
ZINC00585979	2.4022		ZINC02146356	3.6012
ZINC01070102	2.3731		ZINC00124731	3.5897
ZINC03807917	2.3665		ZINC00519490	3.5689
ZINC03815416	2.3379		ZINC00015588	3.566
ZINC03815421	2.2983		ZINC01042172	3.5569
ZINC03815419	2.2261		ZINC04235328	3.5461
ZINC00056546	2.0468		ZINC04464598	3.5434
ZINC03814379	2.0319		ZINC03857827	3.5434
ZINC01587804	1.9708		ZINC03778005	3.5429
ZINC00056434	1.9643		ZINC00354239	3.5255
ZINC00001219	1.9468		ZINC00016008	3.5191
ZINC03815427	1.9029		ZINC03778012	3.5182
ZINC00057656	1.8259		ZINC03199964	3.5124
ZINC00039316	1.8258		ZINC01384938	3.5072
ZINC04150452	1.8225		ZINC00282477	3.5061
ZINC00388660	1.8102		ZINC00015584	3.4938
ZINC03815431	1.8064		ZINC00036452	3.4892
ZINC01510316	1.7231		ZINC04235376	3.4814
ZINC00047551	1.6565		ZINC03888352	3.4808
			ZINC00135894	3.4651
			ZINC04266959	3.4625
			ZINC03861870	3.4594
			ZINC03861869	3.459
			ZINC00486129	3.4554
			ZINC03849549	3.4484
			ZINC00012908	3.4091
			ZINC03861937	3.3968
			ZINC00057822	3.3948
			ZINC02104894	3.3908
			ZINC03952974	3.39
			ZINC03166450	3.3863
			ZINC00408148	3.3858
			ZINC00285876	3.3857
			ZINC00502312	3.3774
			ZINC00007254	3.3653
			ZINC03382325	3.3644
			ZINC03890042	3.3633
			ZINC03819167	3.3621
			ZINC03862019	3.3603
			ZINC03867544	3.3539
			ZINC03166448	3.3505
			ZINC02685706	3.3478
			ZINC00519450	3.3463
			ZINC00005569	3.3387
			ZINC03270568	3.3374
			ZINC03862990	3.3236
			ZINC04045166	3.3229
			ZINC03889557	3.3215
			ZINC03956502	3.3154
			ZINC00935709	3.3142
			ZINC00140314	3.3082
			ZINC00018758	3.3042
			ZINC01666820	3.2996
			ZINC04193893	3.2991
			ZINC03701869	3.2974
			ZINC00556002	3.2968
			ZINC00555999	3.2941
			ZINC00159164	3.2921
			ZINC01506209	3.2905
			ZINC03863381	3.289
			ZINC03891603	3.276
			ZINC00354622	3.272
			ZINC00354625	3.2703
			ZINC03867001	3.2671
			ZINC00024362	3.2623
			ZINC02573673	3.2563
			ZINC00519451	3.2534
			ZINC03701036	3.2522
			ZINC03701017	3.2514
			ZINC04031442	3.2499
			ZINC04470133	3.2459
			ZINC02359546	3.2422
			ZINC01626331	3.2346
			ZINC04466104	3.2343
			ZINC03868498	3.2343
			ZINC01554458	3.2274
			ZINC00172324	3.2268
			ZINC00172332	3.2251
			ZINC00024177	3.2232
			ZINC03030641	3.2192
			ZINC01595661	3.215
			ZINC00556001	3.2139
			ZINC03704661	3.2136
			ZINC03859315	3.2088
			ZINC02236712	3.208
			ZINC03859198	3.2071
			ZINC00556000	3.2048
			ZINC03848643	3.2039
			ZINC03701028	3.2034
			ZINC03858228	3.2012
			ZINC01536668	3.1946
			ZINC04245274	3.1939
			ZINC03892890	3.1893
			ZINC03648155	3.1891
			ZINC03891604	3.1883
			ZINC02597429	3.1855
			ZINC03434681	3.1843
			ZINC03949691	3.1819
			ZINC04465270	3.1807
			ZINC03892170	3.1807
			ZINC03641076	3.1784
			ZINC03882740	3.1777
			ZINC00311482	3.1772
			ZINC03863289	3.1738
			ZINC03977652	3.171
			ZINC01054990	3.1592
			ZINC01575059	3.1578
			ZINC00145938	3.1547
			ZINC00297326	3.1524
			ZINC01576843	3.1487
			ZINC04426137	3.1475
			ZINC00307652	3.1472
			ZINC00280313	3.1462
			ZINC04139348	3.14
			ZINC00519491	3.1376
			ZINC00222225	3.1357
			ZINC00390280	3.1347
			ZINC00024486	3.1286
			ZINC03912587	3.1268
			ZINC02452888	3.126
			ZINC03868887	3.125
			ZINC04368351	3.1139
			ZINC00026416	3.1114
			ZINC00026384	3.1107
			ZINC03648127	3.103
			ZINC00044300	3.1018
			ZINC00009305	3.0938
			ZINC03854573	3.0899
			ZINC01281436	3.0893
			ZINC00556031	3.0892
			ZINC00556032	3.0889
			ZINC00191620	3.0879
			ZINC00279868	3.0873
			ZINC04405328	3.086
			ZINC00519579	3.075
			ZINC00518961	3.0748
			ZINC00110547	3.0746
			ZINC03977653	3.0743
			ZINC03887961	3.0718
			ZINC03962425	3.069
			ZINC00016144	3.0606
			ZINC00436013	3.0585
			ZINC00492807	3.0551
			ZINC01281445	3.0498
			ZINC00268708	3.0496
			ZINC00138773	3.0479
			ZINC00437597	3.042
			ZINC00387859	3.0411
			ZINC03956474	3.0372
			ZINC00387862	3.0367
			ZINC04312943	3.0319
			ZINC00008950	3.0317
			ZINC00225461	3.0297
			ZINC02578733	3.0249
			ZINC00148883	3.0247
			ZINC03394127	3.0235
			ZINC00004619	3.023
			ZINC00175943	3.0225
			ZINC01291412	3.0214
			ZINC00235359	3.0166
			ZINC02354761	3.0151
			ZINC02659985	3.0129
			ZINC00083255	3.0128
			ZINC00033768	3.0128
			ZINC03701034	3.0126
			ZINC03964214	3.011
			ZINC04316909	3.0074
			ZINC04316910	3.0073
			ZINC03863906	3.006
			ZINC03852854	2.9997
			ZINC00486064	2.9978
			ZINC00279800	2.9971
			ZINC03861875	2.9962
			ZINC04030205	2.9961
			ZINC03868881	2.995
			ZINC01291411	2.994
			ZINC04132179	2.9939
			ZINC00230496	2.9938
			ZINC03868880	2.9933
			ZINC03868351	2.993
			ZINC02481994	2.9928
			ZINC00523239	2.9927
			ZINC00127903	2.9907
			ZINC00413717	2.9907
			ZINC03902359	2.9901
			ZINC04413327	2.9887
			ZINC04299240	2.9871
			ZINC02200057	2.9859
			ZINC03868036	2.985
			ZINC00008680	2.9844
			ZINC02026520	2.9803
			ZINC00085198	2.9791
			ZINC03963929	2.9782
			ZINC00195023	2.9772
			ZINC01911903	2.9771
			ZINC03863701	2.9769
			ZINC00341187	2.9765
			ZINC00026786	2.9758
			ZINC03963939	2.9745
			ZINC03883463	2.9743
			ZINC00003728	2.9742
			ZINC00132311	2.9736
			ZINC00556033	2.9731
			ZINC03852771	2.9731
			ZINC00019492	2.9718
			ZINC00215530	2.9705
			ZINC01613570	2.968
			ZINC00034149	2.9679
			ZINC03887063	2.9679
			ZINC02432839	2.9673
			ZINC00148656	2.9672
			ZINC04234725	2.9672
			ZINC03868350	2.9658
			ZINC03962117	2.9658
			ZINC03861882	2.9656
			ZINC02584871	2.9655
			ZINC03585126	2.9647
			ZINC01281434	2.9641
			ZINC03288034	2.964
			ZINC00150676	2.9639
			ZINC03862391	2.9632
			ZINC00053801	2.963
			ZINC00265802	2.963
			ZINC00556030	2.9629
			ZINC02763750	2.9623
			ZINC00217349	2.9622
			ZINC03257891	2.9617
			ZINC03270427	2.9616
			ZINC03243939	2.9616
			ZINC03858620	2.9615
			ZINC03890049	2.9608
			ZINC00419082	2.9607
			ZINC03863221	2.96
			ZINC02561669	2.9597
			ZINC01993830	2.9594
			ZINC02534829	2.9593
			ZINC00611730	2.9582
			ZINC03863700	2.9575
			ZINC04010331	2.9572
			ZINC04045945	2.9561
			ZINC00428763	2.9559
			ZINC03598522	2.9557
			ZINC04045947	2.9554
			ZINC03851837	2.9551
			ZINC00487650	2.9542
			ZINC01094836	2.9539
			ZINC00538861	2.9534
			ZINC01792360	2.9534
			ZINC04350837	2.9526
			ZINC03912094	2.9523
			ZINC00191197	2.9518
			ZINC00128602	2.9513
			ZINC00167632	2.9513
			ZINC03963895	2.9506
			ZINC00092370	2.9496
			ZINC00398505	2.9496
			ZINC03963923	2.9494
			ZINC03891002	2.9493
			ZINC03233024	2.9487
			ZINC03963912	2.9477
			ZINC00019790	2.9472
			ZINC00523352	2.9471
			ZINC00495239	2.9471
			ZINC00019791	2.947
			ZINC02811176	2.947
			ZINC03962434	2.946
			ZINC03273246	2.9459
			ZINC03547621	2.9452
			ZINC03304263	2.9448
			ZINC03479014	2.9443
			ZINC00003760	2.9443
			ZINC02512657	2.943
			ZINC03220572	2.9427
			ZINC00523596	2.9426
			ZINC03998897	2.9426
			ZINC00436528	2.9425
			ZINC00523597	2.9423
			ZINC00036815	2.9411
			ZINC00006006	2.9394
			ZINC03581786	2.9377
			ZINC00036522	2.9376
			ZINC00315507	2.9366
			ZINC00365445	2.9362
			ZINC00132527	2.9357
			ZINC00452350	2.9351
			ZINC00150675	2.9338
			ZINC00112345	2.9333
			ZINC01027997	2.9332
			ZINC00071992	2.9331
			ZINC00272680	2.9329
			ZINC03476460	2.9323
			ZINC00132529	2.9322
			ZINC00280652	2.9319
			ZINC00023047	2.9315
			ZINC00339983	2.9313
			ZINC00339977	2.9313
			ZINC00339979	2.9313
			ZINC00234809	2.931
			ZINC00234816	2.931
			ZINC03704568	2.9308
			ZINC03905742	2.9302
			ZINC03704569	2.9302
			ZINC03995667	2.9301
			ZINC02999401	2.9297
			ZINC03704575	2.9294
			ZINC03912100	2.9292
			ZINC03980300	2.9292
			ZINC04464569	2.9292
			ZINC00071990	2.9287
			ZINC03532440	2.9281
			ZINC00042653	2.9278
			ZINC00513288	2.9274
			ZINC02746880	2.927
			ZINC00427639	2.9267
			ZINC03854572	2.9266
			ZINC00230012	2.9254
			ZINC03890018	2.9254
			ZINC04360485	2.9248
			ZINC02453043	2.9226
			ZINC03955272	2.9219
			ZINC01281437	2.9216
			ZINC02534941	2.9212
			ZINC02362916	2.921
			ZINC00342721	2.9207
			ZINC02903255	2.9203
			ZINC00226425	2.9203
			ZINC04003811	2.9198
			ZINC00188889	2.9192
			ZINC03704559	2.918
			ZINC03704574	2.9178
			ZINC00023046	2.9177
			ZINC03862418	2.9173
			ZINC03862419	2.9172
			ZINC00417878	2.9172
			ZINC02148553	2.9163
			ZINC00033342	2.9162
			ZINC03574681	2.9162
			ZINC01410002	2.9144
			ZINC00344401	2.9144
			ZINC04001309	2.9142
			ZINC00013024	2.9136
			ZINC04470117	2.9134
			ZINC03858229	2.9134
			ZINC02535329	2.9131
			ZINC04011561	2.9127
			ZINC00313435	2.9118
			ZINC00314066	2.9115
			ZINC03862803	2.9111
			ZINC00297668	2.9107
			ZINC00436303	2.9104
			ZINC03892041	2.9098
			ZINC03862640	2.9098
			ZINC03715970	2.9091
			ZINC03850676	2.9087
			ZINC04125498	2.9086
			ZINC03962070	2.9085
			ZINC03867154	2.908
			ZINC04465458	2.908
			ZINC00575575	2.9064
			ZINC03648139	2.9059
			ZINC01690791	2.9058
			ZINC04117622	2.9046
			ZINC03867426	2.9045
			ZINC03704590	2.904
			ZINC02345165	2.9035
			ZINC00257868	2.9034
			ZINC03968761	2.9032
			ZINC03891014	2.903
			ZINC03711332	2.9027
			ZINC03868885	2.9022
			ZINC03868883	2.9021
			ZINC04245307	2.902
			ZINC03912819	2.9019
			ZINC03969763	2.9011
			ZINC03968762	2.9011
			ZINC03868882	2.9009
			ZINC00024487	2.9008
			ZINC03868884	2.9008
			ZINC03891773	2.8993
			ZINC01428555	2.8989
			ZINC03957585	2.8984
			ZINC03868879	2.8979
			ZINC00392984	2.897
			ZINC03648153	2.8957
			ZINC02026515	2.8951
			ZINC03890024	2.8948
			ZINC03963941	2.8944
			ZINC00026164	2.8936
			ZINC03661716	2.8931
			ZINC03863907	2.8928
			ZINC03868891	2.8928
			ZINC00140318	2.8927
			ZINC03963950	2.8923
			ZINC03863071	2.8918
			ZINC03643624	2.8914
			ZINC00544530	2.8892
			ZINC03861829	2.8875
			ZINC03861933	2.8873
			ZINC00036530	2.8863
			ZINC02223055	2.8861
			ZINC00341188	2.8853
			ZINC00342723	2.8849
			ZINC03851218	2.8843
			ZINC03963905	2.8843
			ZINC02423385	2.8834
			ZINC04467866	2.8831
			ZINC03970916	2.8831
			ZINC02333569	2.8827
			ZINC03855970	2.8824
			ZINC03863357	2.8821
			ZINC04468290	2.8815
			ZINC03858425	2.8815
			ZINC03805109	2.8814
			ZINC00143973	2.881
			ZINC00226846	2.8791
			ZINC00000934	2.8774
			ZINC03304260	2.8764
			ZINC00144143	2.8757
			ZINC02854968	2.8749
			ZINC00485689	2.8738
			ZINC00009394	2.8732
			ZINC00581215	2.8717
			ZINC03861830	2.8716
			ZINC00034146	2.8712
			ZINC03868875	2.8709
			ZINC03861876	2.8709
			ZINC01500903	2.8707
			ZINC02306420	2.8705
			ZINC03850583	2.8704
			ZINC02347439	2.8702
			ZINC00302078	2.8695
			ZINC02562057	2.8693
			ZINC04052857	2.8688
			ZINC00561361	2.8684
			ZINC00387861	2.8679
			ZINC00022657	2.8678
			ZINC00036523	2.8676
			ZINC00014171	2.8675
			ZINC00367771	2.8673
			ZINC04114861	2.8667
			ZINC03880449	2.8658
			ZINC03250408	2.8658
			ZINC04338732	2.8657
			ZINC00002832	2.8648
			ZINC00026419	2.8648
			ZINC03861885	2.8645
			ZINC03205476	2.8644
			ZINC00360098	2.8643
			ZINC00016716	2.8639
			ZINC03853447	2.8634
			ZINC03961119	2.8628
			ZINC00544238	2.8626
			ZINC02527121	2.8624
			ZINC00071757	2.8623
			ZINC03857060	2.8622
			ZINC03961129	2.8621
			ZINC03609924	2.8614
			ZINC00063604	2.8613
			ZINC03356061	2.8609
			ZINC00368040	2.8608
			ZINC01536948	2.86
			ZINC00831904	2.8598
			ZINC01433169	2.8592
			ZINC00166050	2.8586
			ZINC00387860	2.8585
			ZINC03868894	2.8578
			ZINC00238473	2.8573
			ZINC04007242	2.8564
			ZINC00297328	2.8556
			ZINC00009603	2.8533
			ZINC00533817	2.8523
			ZINC03950321	2.8522
			ZINC00413712	2.8517
			ZINC00572493	2.8515
			ZINC03912123	2.8511
			ZINC03912122	2.8509
			ZINC01993844	2.8509
			ZINC00476230	2.8507
			ZINC00583042	2.8501
			ZINC03817448	2.8482
			ZINC00023116	2.8481
			ZINC01384954	2.8479
			ZINC00023042	2.8469
			ZINC00061998	2.8464
			ZINC02528970	2.8461
			ZINC03867425	2.8459
			ZINC00179241	2.8458
			ZINC03963904	2.8451
			ZINC00428762	2.8449
			ZINC03057133	2.8447
			ZINC03233025	2.8445
			ZINC01620388	2.8444
			ZINC00482797	2.8442
			ZINC00487312	2.8436
			ZINC03927944	2.8433
			ZINC00106400	2.8432
			ZINC02292290	2.8428
			ZINC00122729	2.8428
			ZINC00138785	2.8428
			ZINC03890022	2.8427
			ZINC00399189	2.8426
			ZINC00111513	2.8426
			ZINC00110324	2.8418
			ZINC03820700	2.8415
			ZINC00126697	2.8413
			ZINC04317099	2.8403
			ZINC04317093	2.8402
			ZINC04317092	2.8402
			ZINC01053687	2.8402
			ZINC00130651	2.8401
			ZINC00390350	2.8397
			ZINC02534955	2.8393
			ZINC03962055	2.8391
			ZINC03668721	2.839
			ZINC00208671	2.8388
			ZINC00110319	2.838
			ZINC00476754	2.8371
			ZINC01639322	2.8369
			ZINC00079216	2.8366
			ZINC00086101	2.8365
			ZINC02385470	2.8364
			ZINC00338118	2.8363
			ZINC03890726	2.836
			ZINC03863395	2.8357
			ZINC03853945	2.8356
			ZINC03711330	2.8353
			ZINC03889532	2.8347
			ZINC03891774	2.8339
			ZINC03898183	2.8336
			ZINC04469517	2.8334
			ZINC03974487	2.8334
			ZINC03858231	2.8324
			ZINC00007265	2.8321
			ZINC00367769	2.8317
			ZINC03566417	2.8312
			ZINC02887707	2.8307
			ZINC00007756	2.8302
			ZINC03889530	2.8301
			ZINC00235823	2.8282
			ZINC03962648	2.8281
			ZINC03164452	2.8268
			ZINC00416281	2.8265
			ZINC00250221	2.8261
			ZINC00312965	2.8255
			ZINC00228351	2.8255
			ZINC02452061	2.8245
			ZINC01883733	2.8242
			ZINC02490261	2.8232
			ZINC03230700	2.8229
			ZINC03613804	2.8227
			ZINC03868474	2.8227
			ZINC04466091	2.8227
			ZINC03868892	2.8225
			ZINC03546810	2.8223
			ZINC00092361	2.8221
			ZINC03820698	2.8214
			ZINC03967912	2.8205
			ZINC00209577	2.8203
			ZINC00210799	2.8203
			ZINC04066451	2.8199
			ZINC00556008	2.8196
			ZINC00250228	2.8195
			ZINC00898027	2.8193
			ZINC02484772	2.8188
			ZINC03967617	2.8186
			ZINC04465937	2.8186
			ZINC01476740	2.818
			ZINC03868187	2.8168
			ZINC03355399	2.8165
			ZINC03866672	2.8164
			ZINC00090076	2.8163
			ZINC01683226	2.8156
			ZINC03862420	2.8155
			ZINC03701019	2.815
			ZINC03711302	2.8148
			ZINC00026300	2.8147
			ZINC00309284	2.8139
			ZINC03233630	2.8139
			ZINC04576942	2.8136
			ZINC00428764	2.8133
			ZINC00210209	2.8131
			ZINC00054550	2.8128
			ZINC01883728	2.8116
			ZINC03209521	2.8102
			ZINC02419496	2.8101
			ZINC02419495	2.8096
			ZINC00556009	2.8089
			ZINC02767146	2.8088
			ZINC02597436	2.8081
			ZINC01196454	2.8075
			ZINC03868890	2.8074
			ZINC00186475	2.8073
			ZINC03868876	2.8066
			ZINC04093831	2.8063
			ZINC03850792	2.806
			ZINC00443411	2.8051
			ZINC00020300	2.8051
			ZINC00297109	2.8048
			ZINC03889103	2.8038
			ZINC00297106	2.8034
			ZINC00123258	2.8029
			ZINC02641117	2.8017
			ZINC01077309	2.8014
			ZINC03962400	2.8012
			ZINC01504755	2.8011
			ZINC00036531	2.8007
			ZINC00090665	2.8004
			ZINC00537955	2.8003
			ZINC03418718	2.8001
			ZINC03188821	2.7999
			ZINC03351617	2.7991
			ZINC04419755	2.7988
			ZINC02741472	2.7973
			ZINC00078857	2.7968
			ZINC03862064	2.7959
			ZINC01924071	2.7947
			ZINC00033767	2.7947
			ZINC04639931	2.7947
			ZINC00063026	2.7939
			ZINC02534843	2.7938
			ZINC02534899	2.7937
			ZINC02777400	2.7936
			ZINC03972165	2.7935
			ZINC02783103	2.7933
			ZINC02546668	2.7923
			ZINC03958082	2.7918
			ZINC03396901	2.7907
			ZINC00272602	2.7903
			ZINC00608581	2.7903
			ZINC00300577	2.7902
			ZINC00562973	2.7892
			ZINC00501370	2.7891
			ZINC00561810	2.7888
			ZINC03896507	2.7885
			ZINC00138880	2.7885
			ZINC03333669	2.7885
			ZINC00117991	2.7883
			ZINC03349880	2.7882
			ZINC00438899	2.7879
			ZINC00011293	2.7866
			ZINC00107247	2.7857
			ZINC00071659	2.7849
			ZINC02777395	2.7848
			ZINC00210340	2.7846
			ZINC03452729	2.7844
			ZINC03802112	2.7834
			ZINC00250266	2.7824
			ZINC02750522	2.7818
			ZINC02883628	2.7814
			ZINC00075840	2.7806
			ZINC00179164	2.7803
			ZINC03846131	2.7803
			ZINC00023041	2.78
			ZINC00194603	2.78
			ZINC04118124	2.78
			ZINC00250259	2.7797
			ZINC00078909	2.779
			ZINC00514644	2.7768
			ZINC03061497	2.7765
			ZINC03853942	2.7763
			ZINC00001503	2.7751
			ZINC02435371	2.775
			ZINC03201888	2.7742
			ZINC03862520	2.7738
			ZINC00184560	2.7732
			ZINC00199651	2.7725
			ZINC00104422	2.7725
			ZINC00235311	2.7725
			ZINC00238763	2.7723
			ZINC02294558	2.7722
			ZINC03962706	2.7721
			ZINC02294557	2.7719
			ZINC04633728	2.7716
			ZINC00505712	2.7715
			ZINC03890985	2.7702
			ZINC00178238	2.7702
			ZINC03233624	2.7693
			ZINC03892093	2.7692
			ZINC01666289	2.7691
			ZINC03889731	2.769
			ZINC03868321	2.7689
			ZINC00093895	2.7689
			ZINC03863843	2.7686
			ZINC02509821	2.7685
			ZINC00086178	2.7681
			ZINC00418205	2.7679
			ZINC00311393	2.7674
			ZINC03355401	2.7671
			ZINC04465462	2.7668
			ZINC03867158	2.7668
			ZINC02534952	2.7666
			ZINC02543468	2.7663
			ZINC04418194	2.7659
			ZINC02750523	2.7655
			ZINC03619825	2.7654
			ZINC00620798	2.7634
			ZINC03890043	2.7624
			ZINC01585780	2.762
			ZINC01620100	2.7614
			ZINC00007872	2.7613
			ZINC04469972	2.7597
			ZINC03993213	2.7597
			ZINC03343072	2.7587
			ZINC00071662	2.7579
			ZINC01279623	2.7577
			ZINC03862256	2.7567
			ZINC03868893	2.7562
			ZINC00213316	2.7557
			ZINC03330631	2.7554
			ZINC03967658	2.7552
			ZINC04466101	2.7552
			ZINC04465946	2.7552
			ZINC03967620	2.7552
			ZINC03902335	2.7551
			ZINC02481049	2.7539
			ZINC02549466	2.7533
			ZINC00008167	2.7529
			ZINC02327096	2.7529
			ZINC03963908	2.7524
			ZINC00413675	2.7519
			ZINC03850712	2.7517
			ZINC00413699	2.7517
			ZINC00416283	2.7517
			ZINC00416286	2.7514
			ZINC03963954	2.7498
			ZINC03963938	2.7496
			ZINC00991276	2.7474
			ZINC00088772	2.7474
			ZINC03987653	2.7465
			ZINC01036277	2.7464
			ZINC00104740	2.7462
			ZINC04025542	2.7456
			ZINC00020469	2.7447
			ZINC03853948	2.7447
			ZINC02789187	2.7445
			ZINC04136953	2.7441
			ZINC04084789	2.743
			ZINC00173761	2.7425
			ZINC00130354	2.742
			ZINC02131344	2.7415
			ZINC01280939	2.7412
			ZINC03093817	2.7397
			ZINC01052190	2.7393
			ZINC02504446	2.7391
			ZINC00239709	2.7391
			ZINC00127670	2.739
			ZINC03584608	2.7388
			ZINC00071730	2.7387
			ZINC02584877	2.7387
			ZINC02179591	2.7385
			ZINC00280240	2.7383
			ZINC03896497	2.7379
			ZINC00213488	2.7371
			ZINC03956441	2.7371
			ZINC03963876	2.7368
			ZINC00126802	2.7355
			ZINC03863352	2.735
			ZINC00868863	2.7349
			ZINC00868864	2.7348
			ZINC02474999	2.7347
			ZINC00008878	2.7342
			ZINC01100920	2.7337
			ZINC03851251	2.7329
			ZINC00245828	2.7324
			ZINC00558003	2.7322
			ZINC01742864	2.7317
			ZINC03968609	2.7315
			ZINC01677173	2.7308
			ZINC02364744	2.7302
			ZINC00386458	2.7295
			ZINC00062228	2.7288
			ZINC02534956	2.7283
			ZINC00262378	2.7279
			ZINC00365447	2.7277
			ZINC03396907	2.7274
			ZINC00297090	2.7272
			ZINC04627846	2.7261
			ZINC02584887	2.7256
			ZINC03073069	2.7248
			ZINC03704548	2.7246
			ZINC03912567	2.7245
			ZINC02782960	2.7243
			ZINC01319998	2.7241
			ZINC00169728	2.7207
			ZINC00116297	2.7204
			ZINC00390202	2.7198
			ZINC03547661	2.7189
			ZINC00082450	2.7172
			ZINC04632807	2.717
			ZINC03915640	2.7169
			ZINC03977698	2.716
			ZINC03868889	2.7155
			ZINC02813806	2.7153
			ZINC00025512	2.7152
			ZINC00184583	2.715
			ZINC00390238	2.7137
			ZINC00495351	2.7096
			ZINC00121839	2.7093
			ZINC00121842	2.7093
			ZINC02330112	2.7091
			ZINC00004404	2.709
			ZINC03968602	2.7073
			ZINC00485045	2.7071
			ZINC00138891	2.7046
			ZINC03862142	2.7043
			ZINC03886022	2.7042
			ZINC03787862	2.7041
			ZINC00023395	2.7039
			ZINC03867424	2.7034
			ZINC03243823	2.7033
			ZINC03866931	2.702
			ZINC03868323	2.7019
			ZINC04030688	2.7011
			ZINC03867211	2.7008
			ZINC04443785	2.7003
			ZINC00534618	2.7003
			ZINC00464494	2.6993
			ZINC03473372	2.6985
			ZINC00534256	2.6984
			ZINC00534925	2.6983
			ZINC00451771	2.6982
			ZINC00243533	2.6981
			ZINC03963037	2.6976
			ZINC00571929	2.6966
			ZINC00351100	2.6962
			ZINC03209699	2.6954
			ZINC00146248	2.6943
			ZINC01041070	2.6942
			ZINC00227773	2.6942
			ZINC01041069	2.6941
			ZINC00429463	2.6939
			ZINC00238764	2.6938
			ZINC03868322	2.6935
			ZINC04288772	2.6931
			ZINC03862237	2.693
			ZINC03857826	2.6929
			ZINC03355404	2.6919
			ZINC03396910	2.6918
			ZINC02754011	2.6916
			ZINC02263982	2.6914
			ZINC00113368	2.6908
			ZINC00093526	2.6895
			ZINC00241870	2.6894
			ZINC03311200	2.6881
			ZINC03891997	2.688
			ZINC00423030	2.6866
			ZINC00010950	2.6864
			ZINC00043980	2.6863
			ZINC03862849	2.6844
			ZINC03889479	2.6827
			ZINC03043061	2.6826
			ZINC03891550	2.6821
			ZINC00122971	2.682
			ZINC00271980	2.6817
			ZINC00272668	2.6817
			ZINC00194013	2.6811
			ZINC00075320	2.6809
			ZINC02210173	2.6809
			ZINC03891595	2.6805
			ZINC02534916	2.6804
			ZINC03885633	2.6801
			ZINC03891594	2.6793
			ZINC00543381	2.6791
			ZINC03998675	2.6788
			ZINC03246319	2.6779
			ZINC02360726	2.6778
			ZINC01077308	2.6758
			ZINC02438608	2.6753
			ZINC02327583	2.6753
			ZINC02464572	2.6739
			ZINC04484684	2.6738
			ZINC00484450	2.6728
			ZINC00003978	2.6727
			ZINC02009400	2.6717
			ZINC04129069	2.6711
			ZINC00580369	2.671
			ZINC03858024	2.6707
			ZINC03855991	2.6705
			ZINC01410464	2.6696
			ZINC00520762	2.6685
			ZINC00092695	2.6683
			ZINC02223200	2.6674
			ZINC00079521	2.667
			ZINC00052758	2.6669
			ZINC02330094	2.6651
			ZINC00558005	2.6646
			ZINC03268080	2.6639
			ZINC03861816	2.6632
			ZINC01580906	2.6631
			ZINC00024360	2.663
			ZINC03156920	2.663
			ZINC00045705	2.662
			ZINC00501132	2.6607
			ZINC02179592	2.6605
			ZINC03364389	2.6602
			ZINC03959122	2.66
			ZINC04470253	2.66
			ZINC02889052	2.6596
			ZINC00071496	2.6589
			ZINC00556010	2.6588
			ZINC03706340	2.6583
			ZINC00133196	2.6582
			ZINC03178797	2.6577
			ZINC00264282	2.6576
			ZINC03867760	2.6574
			ZINC03379538	2.6571
			ZINC02918209	2.6569
			ZINC00314940	2.6568
			ZINC03559027	2.6566
			ZINC00484452	2.6565
			ZINC00588445	2.6556
			ZINC03963873	2.6552
			ZINC03867761	2.6551
			ZINC04465735	2.6551
			ZINC02720596	2.6536
			ZINC02720595	2.6536
			ZINC03185350	2.6535
			ZINC00556007	2.6526
			ZINC00297690	2.6522
			ZINC00011787	2.651
			ZINC03868886	2.651
			ZINC00074973	2.6508
			ZINC03889373	2.6505
			ZINC03289680	2.6501
			ZINC00554965	2.6496
			ZINC00596101	2.6492
			ZINC00181419	2.6489
			ZINC03859894	2.6471
			ZINC04000726	2.6462
			ZINC00573451	2.6461
			ZINC02502582	2.6461
			ZINC01569660	2.6457
			ZINC00040761	2.6454
			ZINC01054102	2.6452
			ZINC00381510	2.6444
			ZINC02891271	2.6444
			ZINC03351615	2.6443
			ZINC00524370	2.644
			ZINC00358181	2.6436
			ZINC01922532	2.6433
			ZINC00111800	2.6428
			ZINC04003655	2.6423
			ZINC00012482	2.642
			ZINC04441339	2.6411
			ZINC00268704	2.6408
			ZINC00579979	2.6399
			ZINC03182193	2.6396
			ZINC00226379	2.6378
			ZINC03848076	2.6376
			ZINC00456090	2.637
			ZINC00392237	2.6364
			ZINC00317099	2.6359
			ZINC00111980	2.6351
			ZINC03912081	2.6334
			ZINC03959140	2.6334
			ZINC03866924	2.631
			ZINC03867654	2.6297
			ZINC03619722	2.6294
			ZINC03912090	2.6291
			ZINC00041448	2.6283
			ZINC03345294	2.6282
			ZINC04095457	2.6282
			ZINC03956414	2.627
			ZINC03889189	2.6255
			ZINC04501924	2.6252
			ZINC02130508	2.6251
			ZINC01017493	2.6244
			ZINC00539994	2.6243
			ZINC04147175	2.6243
			ZINC00185159	2.624
			ZINC00482802	2.6238
			ZINC00365219	2.6237
			ZINC00041939	2.6234
			ZINC03241272	2.6231
			ZINC03874293	2.6227
			ZINC03241273	2.6221
			ZINC02315488	2.6219
			ZINC03890798	2.6215
			ZINC03944975	2.621
			ZINC00398617	2.621
			ZINC00184134	2.6206
			ZINC04011518	2.6206
			ZINC01757351	2.6202
			ZINC00437295	2.6165
			ZINC02790570	2.6164
			ZINC00112038	2.6157
			ZINC00383792	2.6146
			ZINC00018239	2.6129
			ZINC04001281	2.6125
			ZINC00024178	2.6116
			ZINC00437528	2.6113
			ZINC00300945	2.6111
			ZINC00311200	2.6108
			ZINC00300950	2.6106
			ZINC00565750	2.6097
			ZINC01654061	2.608
			ZINC04036395	2.6075
			ZINC04390362	2.6074
			ZINC00539308	2.6072
			ZINC02431617	2.607
			ZINC00437811	2.6068
			ZINC03972174	2.6067
			ZINC02628036	2.6066
			ZINC03198588	2.6063
			ZINC00177986	2.6055
			ZINC00405331	2.6051
			ZINC00000189	2.6048
			ZINC03101851	2.6039
			ZINC02645358	2.6034
			ZINC02469681	2.6023
			ZINC00572494	2.6022
			ZINC03891611	2.6014
			ZINC00007345	2.6013
			ZINC02606577	2.6009
			ZINC04251127	2.6001
			ZINC00968262	2.5992
			ZINC00320812	2.5988
			ZINC03152757	2.5988
			ZINC00133325	2.5976
			ZINC04094697	2.5975
			ZINC00007287	2.5973
			ZINC03868495	2.5967
			ZINC04392005	2.5964
			ZINC00305185	2.5955
			ZINC00279792	2.5952
			ZINC04594809	2.5936
			ZINC03778009	2.5936
			ZINC03778001	2.5935
			ZINC03868608	2.5928
			ZINC03322345	2.592
			ZINC00034144	2.5912
			ZINC01394939	2.5911
			ZINC02561986	2.5906
			ZINC00268518	2.5881
			ZINC00510125	2.5865
			ZINC02755350	2.5861
			ZINC00192127	2.5853
			ZINC00021531	2.5851
			ZINC02541427	2.5846
			ZINC03952329	2.5843
			ZINC00504692	2.5842
			ZINC00151809	2.5833
			ZINC00130638	2.5818
			ZINC04139377	2.5809
			ZINC01100919	2.5808
			ZINC03198657	2.58
			ZINC00339978	2.5791
			ZINC00339976	2.579
			ZINC00123261	2.5789
			ZINC03861936	2.5785
			ZINC00339980	2.5783
			ZINC00234811	2.5775
			ZINC00234806	2.5773
			ZINC03890563	2.576
			ZINC03862848	2.5759
			ZINC00111802	2.5756
			ZINC03972183	2.5728
			ZINC04470350	2.5728
			ZINC00245783	2.5722
			ZINC00466494	2.572
			ZINC03631036	2.5715
			ZINC00292702	2.5707
			ZINC01514781	2.5707
			ZINC00565733	2.5705
			ZINC00061999	2.5696
			ZINC00247015	2.5677
			ZINC03300932	2.5665
			ZINC00565735	2.5664
			ZINC04490978	2.5657
			ZINC03868185	2.565
			ZINC00184584	2.565
			ZINC02452858	2.5649
			ZINC02685704	2.564
			ZINC00447748	2.5617
			ZINC00063606	2.5611
			ZINC03855047	2.5601
			ZINC00500205	2.5593
			ZINC00482806	2.5582
			ZINC01247845	2.5571
			ZINC02738013	2.5564
			ZINC02738012	2.5563
			ZINC00127258	2.5559
			ZINC00385818	2.5551
			ZINC01857883	2.5537
			ZINC00393543	2.5528
			ZINC02550132	2.5524
			ZINC00330816	2.5523
			ZINC00271538	2.5521
			ZINC04227359	2.5503
			ZINC01682044	2.549
			ZINC03852765	2.548
			ZINC01630593	2.5479
			ZINC03902342	2.5477
			ZINC01422182	2.5475
			ZINC03340227	2.547
			ZINC00112541	2.5459
			ZINC00411147	2.5452
			ZINC02490270	2.5447
			ZINC00023114	2.5445
			ZINC00224129	2.5435
			ZINC02593207	2.5433
			ZINC02213867	2.5428
			ZINC03868413	2.5422
			ZINC00082478	2.5408
			ZINC00486185	2.5406
			ZINC03997278	2.5402
			ZINC01699583	2.5401
			ZINC02360727	2.5387
			ZINC03862703	2.5381
			ZINC00375044	2.538
			ZINC03482000	2.537
			ZINC03196581	2.5365
			ZINC03902340	2.5347
			ZINC00383791	2.5341
			ZINC03698280	2.5339
			ZINC03698282	2.5339
			ZINC01126443	2.5338
			ZINC00383790	2.5332
			ZINC03698250	2.5332
			ZINC01678820	2.5331
			ZINC00296603	2.5326
			ZINC03396406	2.5322
			ZINC00433585	2.5316
			ZINC03612965	2.5312
			ZINC00441601	2.5307
			ZINC04364903	2.5302
			ZINC00407239	2.5291
			ZINC00505728	2.5281
			ZINC01670243	2.5267
			ZINC00038746	2.5258
			ZINC04488647	2.5254
			ZINC00434183	2.5253
			ZINC00250236	2.5253
			ZINC00223334	2.5238
			ZINC00524371	2.5233
			ZINC03867316	2.5231
			ZINC00565335	2.5227
			ZINC00091194	2.5225
			ZINC00128048	2.5213
			ZINC01269839	2.5203
			ZINC04012477	2.5201
			ZINC03890259	2.5198
			ZINC03862842	2.5198
			ZINC04138128	2.5197
			ZINC00550351	2.5197
			ZINC00817982	2.5195
			ZINC04001310	2.5174
			ZINC01055040	2.5161
			ZINC00259547	2.516
			ZINC00116393	2.5157
			ZINC00443515	2.5154
			ZINC02843193	2.5154
			ZINC00269608	2.5146
			ZINC00362700	2.5141
			ZINC00400425	2.5112
			ZINC02627803	2.5095
			ZINC01542777	2.5084
			ZINC00416285	2.5078
			ZINC00994227	2.5058
			ZINC00289653	2.5056
			ZINC03892157	2.5053
			ZINC00011780	2.5048
			ZINC03922122	2.5046
			ZINC00045738	2.5046
			ZINC03861883	2.5033
			ZINC00045734	2.5011
			ZINC00287363	2.5006
			ZINC00505704	2.4982
			ZINC00009687	2.4972
			ZINC00011877	2.4968
			ZINC03863893	2.496
			ZINC00225343	2.4945
			ZINC00433606	2.4943
			ZINC03532447	2.4942
			ZINC03891998	2.4941
			ZINC00275194	2.4941
			ZINC00575206	2.4939
			ZINC00041023	2.4937
			ZINC00041025	2.4935
			ZINC03891776	2.4933
			ZINC03851252	2.4928
			ZINC03033062	2.4917
			ZINC00102978	2.4905
			ZINC00507019	2.4903
			ZINC03863941	2.4903
			ZINC00501131	2.4901
			ZINC03912645	2.4892
			ZINC00258382	2.489
			ZINC00386540	2.4885
			ZINC03809953	2.4881
			ZINC00374072	2.4878
			ZINC01279320	2.4869
			ZINC00613887	2.4866
			ZINC00280330	2.4853
			ZINC03695689	2.4839
			ZINC00261578	2.4837
			ZINC04627845	2.4835
			ZINC03855990	2.4826
			ZINC00413697	2.4826
			ZINC00330819	2.4822
			ZINC03890095	2.4817
			ZINC03257738	2.4811
			ZINC03990121	2.481
			ZINC00148912	2.4803
			ZINC04443288	2.4789
			ZINC02079717	2.4784
			ZINC02079715	2.4783
			ZINC00513684	2.478
			ZINC00005909	2.478
			ZINC00194767	2.4776
			ZINC01580673	2.4774
			ZINC03145349	2.477
			ZINC00265009	2.477
			ZINC03977594	2.4768
			ZINC00300674	2.4764
			ZINC00435701	2.4764
			ZINC04381925	2.4761
			ZINC03463306	2.4755
			ZINC01292227	2.4748
			ZINC02939083	2.4747
			ZINC00485402	2.4742
			ZINC00283151	2.4737
			ZINC03863011	2.4722
			ZINC00062229	2.4713
			ZINC00199617	2.4711
			ZINC03851155	2.4704
			ZINC03877847	2.4696
			ZINC00194010	2.4693
			ZINC03874005	2.4687
			ZINC03868067	2.4685
			ZINC02796081	2.4683
			ZINC04217587	2.4662
			ZINC03859539	2.4651
			ZINC00580874	2.4645
			ZINC00236108	2.4645
			ZINC02950611	2.4632
			ZINC01922552	2.4626
			ZINC00236112	2.4616
			ZINC02875050	2.4607
			ZINC03863904	2.4593
			ZINC02529411	2.4585
			ZINC00485084	2.4585
			ZINC00508501	2.4575
			ZINC00318172	2.4556
			ZINC03868878	2.4536
			ZINC00168076	2.4536
			ZINC03862293	2.4533
			ZINC00061402	2.4505
			ZINC03590134	2.4492
			ZINC03698281	2.4472
			ZINC00023979	2.4457
			ZINC03779780	2.4436
			ZINC03892042	2.4433
			ZINC01275347	2.4424
			ZINC00477507	2.4422
			ZINC01696129	2.4409
			ZINC00380387	2.4407
			ZINC03836286	2.4383
			ZINC00583021	2.4379
			ZINC00393907	2.4379
			ZINC03890045	2.4371
			ZINC00464164	2.435
			ZINC02843196	2.4348
			ZINC03862171	2.4346
			ZINC00463525	2.4345
			ZINC00032057	2.4342
			ZINC00279679	2.4333
			ZINC00002614	2.4298
			ZINC01507835	2.4292
			ZINC00018501	2.4265
			ZINC01422183	2.4231
			ZINC01399032	2.4219
			ZINC03580564	2.4195
			ZINC03340262	2.4195
			ZINC00204006	2.4188
			ZINC03853950	2.4188
			ZINC00213463	2.4187
			ZINC02161451	2.4182
			ZINC00232436	2.4177
			ZINC02558529	2.4168
			ZINC03861873	2.4165
			ZINC03265819	2.4129
			ZINC03610252	2.4105
			ZINC03619635	2.4091
			ZINC03863905	2.4081
			ZINC02865841	2.4076
			ZINC00346712	2.4072
			ZINC01612041	2.407
			ZINC01961566	2.402
			ZINC03997420	2.3983
			ZINC00229083	2.3956
			ZINC00501945	2.3945
			ZINC03866974	2.3932
			ZINC00008591	2.3929
			ZINC00059434	2.3926
			ZINC03977660	2.3864
			ZINC04459057	2.3864
			ZINC00091248	2.3838
			ZINC03891889	2.3804
			ZINC03867187	2.3792
			ZINC03867188	2.3792
			ZINC00161107	2.378
			ZINC00184724	2.3778
			ZINC00413684	2.3777
			ZINC03963228	2.3776
			ZINC01280904	2.3761
			ZINC01470617	2.3753
			ZINC00563049	2.374
			ZINC02518947	2.3725
			ZINC00229627	2.372
			ZINC00440469	2.3714
			ZINC04177102	2.3713
			ZINC01708605	2.371
			ZINC00125584	2.37
			ZINC00287361	2.3693
			ZINC00903783	2.365
			ZINC03151515	2.3649
			ZINC00186075	2.3648
			ZINC00035651	2.3647
			ZINC00389943	2.3644
			ZINC03189156	2.3642
			ZINC00150939	2.3641
			ZINC02464434	2.3636
			ZINC00573338	2.363
			ZINC02524786	2.3596
			ZINC02543369	2.3564
			ZINC00104760	2.3526
			ZINC03973862	2.3516
			ZINC00520032	2.3509
			ZINC03863323	2.3491
			ZINC01881588	2.3489
			ZINC01840706	2.3488
			ZINC03652769	2.3473
			ZINC03891791	2.347
			ZINC01516515	2.346
			ZINC03853524	2.3455
			ZINC01961565	2.3448
			ZINC00519960	2.3429
			ZINC00178800	2.3423
			ZINC01410003	2.3418
			ZINC01880250	2.3394
			ZINC03944815	2.3387
			ZINC00130309	2.3324
			ZINC03505450	2.3319
			ZINC00061403	2.3312
			ZINC00227333	2.3291
			ZINC03861881	2.3267
			ZINC02157878	2.3259
			ZINC03698273	2.3258
			ZINC01704165	2.3226
			ZINC03863290	2.3215
			ZINC03817444	2.3168
			ZINC00390467	2.3161
			ZINC02879866	2.315
			ZINC02558527	2.3088
			ZINC03868874	2.308
			ZINC03960801	2.3048
			ZINC01598745	2.3041
			ZINC00432670	2.3039
			ZINC00390200	2.3025
			ZINC03892156	2.2985
			ZINC01472305	2.2959
			ZINC01459881	2.2951
			ZINC03868607	2.2945
			ZINC00311467	2.2938
			ZINC00127200	2.2924
			ZINC02136055	2.2917
			ZINC01924075	2.2899
			ZINC02737954	2.2889
			ZINC00229306	2.2884
			ZINC00122667	2.2875
			ZINC04469500	2.2823
			ZINC03580562	2.2795
			ZINC03580539	2.2795
			ZINC03878696	2.2793
			ZINC04177114	2.2781
			ZINC03963936	2.2753
			ZINC00293945	2.2729
			ZINC00111788	2.2699
			ZINC00111791	2.2698
			ZINC00246653	2.2665
			ZINC03963934	2.2654
			ZINC03889602	2.2627
			ZINC00152683	2.2623
			ZINC00448984	2.2619
			ZINC03971488	2.2616
			ZINC03616230	2.2589
			ZINC03980304	2.2563
			ZINC00246658	2.2526
			ZINC03813975	2.2456
			ZINC00213324	2.2426
			ZINC03890263	2.2421
			ZINC00293942	2.2408
			ZINC03852826	2.2402
			ZINC02023791	2.236
			ZINC00225299	2.2359
			ZINC00246672	2.2357
			ZINC03853949	2.2327
			ZINC00347452	2.2318
			ZINC00373971	2.2276
			ZINC00381509	2.222
			ZINC00565640	2.2199
			ZINC03185136	2.2198
			ZINC02737934	2.2182
			ZINC02701585	2.2158
			ZINC02156127	2.214
			ZINC03319694	2.2122
			ZINC00433715	2.2091
			ZINC03890261	2.2072
			ZINC03609376	2.2006
			ZINC03558988	2.1975
			ZINC00263250	2.1968
			ZINC00033888	2.1956
			ZINC01320283	2.1948
			ZINC00223312	2.1935
			ZINC00565333	2.1932
			ZINC03468913	2.1911
			ZINC01650989	2.1902
			ZINC00463755	2.1885
			ZINC03236879	2.1842
			ZINC00038124	2.1789
			ZINC03972166	2.1775
			ZINC00234068	2.1773
			ZINC00234075	2.1769
			ZINC03239531	2.1761
			ZINC00228272	2.1752
			ZINC00114537	2.1752
			ZINC01398321	2.1745
			ZINC02833281	2.1741
			ZINC00270572	2.1705
			ZINC00291349	2.1705
			ZINC02760792	2.1677
			ZINC03856290	2.1667
			ZINC00054232	2.1652
			ZINC00224260	2.1611
			ZINC01627515	2.1573
			ZINC00346288	2.152
			ZINC04138328	2.1497
			ZINC00134779	2.1496
			ZINC00574856	2.144
			ZINC00111884	2.1426
			ZINC03848978	2.1409
			ZINC00134776	2.1401
			ZINC03597007	2.1392
			ZINC02482877	2.1388
			ZINC00246668	2.1376
			ZINC02217534	2.1321
			ZINC00367848	2.1267
			ZINC00483922	2.1232
			ZINC00478414	2.1231
			ZINC00483921	2.1222
			ZINC03868329	2.1169
			ZINC03958220	2.1059
			ZINC03471464	2.1055
			ZINC03890734	2.1042
			ZINC01876582	2.1041
			ZINC04327825	2.0992
			ZINC00273511	2.0991
			ZINC03868497	2.0958
			ZINC00429497	2.0865
			ZINC00336612	2.0845
			ZINC00257645	2.0768
			ZINC03867215	2.0659
			ZINC03868328	2.0625
			ZINC04465985	2.0625
			ZINC04104394	2.0611
			ZINC03233620	2.054
			ZINC00330864	2.0521
			ZINC04235099	2.0503
			ZINC03970838	2.0502
			ZINC03861911	2.0488
			ZINC00185696	2.0458
			ZINC00432636	2.0453
			ZINC03863965	2.0423
			ZINC01586846	2.0401
			ZINC00104724	2.0399
			ZINC03861812	2.0308
			ZINC00076968	2.0258
			ZINC00013208	2.0227
			ZINC03845596	2.0168
			ZINC02818370	2.0109
			ZINC02336994	2.0092
			ZINC00373968	2.0081
			ZINC02645085	2.003
			ZINC03867208	2.0003
			ZINC01518999	1.9996
			ZINC00185169	1.998
			ZINC01616861	1.9979
			ZINC00420824	1.9974
			ZINC01446485	1.9969
			ZINC01446486	1.9962
			ZINC04366879	1.9957
			ZINC02720594	1.9947
			ZINC01815001	1.9921
			ZINC00179288	1.9918
			ZINC01519000	1.9907
			ZINC03588493	1.9905
			ZINC03968753	1.99
			ZINC03487539	1.9899
			ZINC00009653	1.9883
			ZINC03862417	1.9876
			ZINC00225610	1.9874
			ZINC03194246	1.9848
			ZINC00423349	1.9844
			ZINC03362560	1.9837
			ZINC00974832	1.9823
			ZINC00974831	1.9816
			ZINC02819819	1.9807
			ZINC00331931	1.9804
			ZINC01456701	1.979
			ZINC03890623	1.9782
			ZINC00387281	1.9758
			ZINC03949689	1.9751
			ZINC01016455	1.9735
			ZINC03917924	1.9719
			ZINC00392507	1.9703
			ZINC03866910	1.9697
			ZINC03943315	1.969
			ZINC00100029	1.9672
			ZINC02510611	1.9669
			ZINC03977634	1.9655
			ZINC02743869	1.964
			ZINC03233621	1.9601
			ZINC03903640	1.96
			ZINC04084803	1.9595
			ZINC04485868	1.9576
			ZINC00432422	1.9558
			ZINC00565745	1.9508
			ZINC03591896	1.9507
			ZINC03957527	1.9495
			ZINC03958184	1.9485
			ZINC04024702	1.9482
			ZINC03860040	1.9465
			ZINC01318904	1.9432
			ZINC03853525	1.9395
			ZINC00074892	1.9376
			ZINC04416664	1.9364
			ZINC00137051	1.9363
			ZINC00027212	1.936
			ZINC03963666	1.9354
			ZINC04444273	1.9333
			ZINC00338553	1.9321
			ZINC00439137	1.9295
			ZINC03861910	1.9291
			ZINC00432423	1.9284
			ZINC03305469	1.928
			ZINC04627852	1.9277
			ZINC03863745	1.9263
			ZINC00284075	1.9262
			ZINC03862452	1.9258
			ZINC02130571	1.9251
			ZINC00043901	1.9231
			ZINC00282386	1.9229
			ZINC00452606	1.9229
			ZINC00509885	1.9227
			ZINC00561163	1.9221
			ZINC00586216	1.9213
			ZINC03862253	1.9211
			ZINC00005140	1.9197
			ZINC00089835	1.9191
			ZINC00099109	1.9189
			ZINC00099105	1.9187
			ZINC00503366	1.9186
			ZINC00162705	1.9184
			ZINC00162707	1.9176
			ZINC00162703	1.917
			ZINC03862230	1.9155
			ZINC00563784	1.9147
			ZINC03546588	1.9127
			ZINC03862521	1.9125
			ZINC03157856	1.9067
			ZINC00246384	1.9063
			ZINC04135874	1.9059
			ZINC00463113	1.9051
			ZINC00580984	1.904
			ZINC00364397	1.9019
			ZINC00487938	1.9008
			ZINC03194076	1.8941
			ZINC00003434	1.8937
			ZINC00108286	1.892
			ZINC00305188	1.8918
			ZINC00230498	1.891
			ZINC02541465	1.8901
			ZINC03977636	1.8887
			ZINC03280829	1.8864
			ZINC00561955	1.8856
			ZINC04275810	1.8853
			ZINC04015227	1.8842
			ZINC00503365	1.8837
			ZINC04365089	1.8821
			ZINC03990124	1.8784
			ZINC00092324	1.878
			ZINC03853328	1.8777
			ZINC04445616	1.8776
			ZINC03016439	1.8756
			ZINC02455152	1.8751
			ZINC03967002	1.8726
			ZINC02580949	1.8723
			ZINC01859746	1.87
			ZINC03862151	1.8672
			ZINC00280320	1.8661
			ZINC03440753	1.8563
			ZINC00337522	1.855
			ZINC00562947	1.8544
			ZINC00452607	1.8525
			ZINC02161454	1.8522
			ZINC00487022	1.8517
			ZINC03862796	1.8477
			ZINC03968512	1.8472
			ZINC04053914	1.8467
			ZINC03955270	1.8444
			ZINC03711154	1.8441
			ZINC03963552	1.8441
			ZINC03890725	1.844
			ZINC00004683	1.8374
			ZINC00469488	1.8338
			ZINC00399905	1.8335
			ZINC03868037	1.833
			ZINC04465906	1.833
			ZINC03862065	1.8329
			ZINC01070713	1.8315
			ZINC03975208	1.821
			ZINC03352363	1.8183
			ZINC00546444	1.8178
			ZINC03352358	1.8177
			ZINC03857437	1.8163
			ZINC02737933	1.8156
			ZINC00103432	1.8149
			ZINC04104321	1.8128
			ZINC00282372	1.8123
			ZINC00527767	1.8083
			ZINC03854914	1.8067
			ZINC03997271	1.805
			ZINC03866716	1.8042
			ZINC04059952	1.8026
			ZINC03335616	1.8014
			ZINC03861912	1.801
			ZINC00344025	1.8003
			ZINC03862416	1.8001
			ZINC03863763	1.8001
			ZINC01501442	1.8
			ZINC02022163	1.799
			ZINC03711229	1.7969
			ZINC04300899	1.7958
			ZINC00250698	1.7955
			ZINC03817440	1.7924
			ZINC00262587	1.791
			ZINC03889697	1.7868
			ZINC00088513	1.7847
			ZINC03977693	1.7834
			ZINC03868068	1.783
			ZINC02267756	1.7806
			ZINC02534972	1.7749
			ZINC03078614	1.7743
			ZINC00512594	1.7741
			ZINC03862797	1.7741
			ZINC01398627	1.7729
			ZINC00610972	1.7721
			ZINC01658350	1.772
			ZINC00422990	1.7719
			ZINC00495265	1.7711
			ZINC04469606	1.771
			ZINC00551476	1.7688
			ZINC04116089	1.7661
			ZINC03851063	1.7654
			ZINC03305074	1.765
			ZINC00335546	1.7649
			ZINC03889197	1.76
			ZINC03239532	1.758
			ZINC00403003	1.7517
			ZINC03853430	1.7467
			ZINC00510393	1.7455
			ZINC03600247	1.7433
			ZINC04104318	1.742
			ZINC04352527	1.7392
			ZINC03505438	1.7365
			ZINC03711133	1.7327
			ZINC04277133	1.7288
			ZINC00621552	1.7255
			ZINC00043125	1.7228
			ZINC04426130	1.7176
			ZINC00038430	1.7144
			ZINC00542920	1.7131
			ZINC00228227	1.7115
			ZINC02506009	1.7101
			ZINC00390822	1.7096
			ZINC00246386	1.7056
			ZINC02524319	1.7053
			ZINC03853737	1.7053
			ZINC00009328	1.7013
			ZINC03977692	1.6979
			ZINC03249699	1.6901
			ZINC00538840	1.6841
			ZINC00543192	1.6834
			ZINC02535865	1.6769
			ZINC01312064	1.6766
			ZINC02790609	1.6757
			ZINC00288555	1.6748
			ZINC03388867	1.6748
			ZINC02877819	1.6741
			ZINC03858879	1.6723
			ZINC03867453	1.6706
			ZINC00370585	1.663
			ZINC01052591	1.6595
			ZINC03890097	1.6579
			ZINC00004624	1.6579
			ZINC03313643	1.657
			ZINC03318814	1.6564
			ZINC04268527	1.6518
			ZINC03706060	1.6515
			ZINC00186643	1.651
			ZINC00386224	1.6388
			ZINC00180650	1.6375
			ZINC00452658	1.6337
			ZINC03868452	1.6285
			ZINC00809344	1.6285
			ZINC00134376	1.617
			ZINC02558500	1.61
			ZINC03987446	1.6057
			ZINC00022647	1.6048
			ZINC00006959	1.6047
			ZINC00233102	1.6043
			ZINC00009661	1.6038
			ZINC02651581	1.5959
			ZINC04094698	1.5938
			ZINC00566642	1.5889
			ZINC03227931	1.5885
			ZINC03468921	1.5856
			ZINC00084629	1.5827
			ZINC00084632	1.577
			ZINC03194249	1.577
			ZINC00012150	1.5738
			ZINC00125104	1.5673
			ZINC00012591	1.5629
			ZINC03889768	1.5569
			ZINC03890335	1.5567
			ZINC00236871	1.5452
			ZINC03963957	1.5332
			ZINC00541301	1.5292
			ZINC02173032	1.5275
			ZINC03853405	1.5264
			ZINC04294191	1.5182
			ZINC00373926	1.5164
			ZINC00008170	1.5109
			ZINC03868596	1.5107
			ZINC04466167	1.5107
			ZINC04121849	1.5106
			ZINC00020337	1.5081
			ZINC03890444	1.5034
			ZINC04023848	1.4908
			ZINC00578005	1.4842
			ZINC02439757	1.4776
			ZINC02231288	1.4509
			ZINC02764567	1.4448
			ZINC03853575	1.442
			ZINC03850705	1.422
			ZINC00072899	1.418
			ZINC03938273	1.4163
			ZINC03968673	1.4137
			ZINC00090996	1.4106
			ZINC02753859	1.3906
			ZINC00182337	1.3904
			ZINC00033273	1.3701
			ZINC02753858	1.3557
			ZINC03253049	1.3477
			ZINC03265816	1.3352
			ZINC03704041	1.3007
			ZINC01459882	1.2976
			ZINC01402582	1.2908
			ZINC00363836	1.2887
			ZINC01181126	1.2871
			ZINC00068857	1.2769
			ZINC03867897	1.2744
			ZINC02506006	1.2648
			ZINC03329605	1.2631
			ZINC00009379	1.2546
			ZINC02162373	1.2318
			ZINC02558531	1.2315
			ZINC04333021	1.205
			ZINC03468792	1.2019
			ZINC03075209	1.2018
			ZINC04135833	1.1135
			ZINC01754793	1.0677
			ZINC00252220	1.0667
			ZINC00271772	1.0667
			ZINC03253052	1.0637
			ZINC04441609	0.983
			ZINC00305251	0.9761
			ZINC03970837	0.8915
			ZINC00258914	0.8315
			ZINC00264285	0.7885
			ZINC00071155	0.6106
			ZINC00227300	0.6105

## Sheet: Ligandscout
ligands			decoys
Name	Fit Value		Name	Fit Value
ZINC03861549	6.94667		ZINC04420150	7.02139
ZINC04150452	6.6513		ZINC00009305	6.9435
ZINC03872293	6.3754		ZINC03950321	6.231
ZINC01666991	6.306		ZINC00026251	5.8606
ZINC00056548	6.2819		ZINC00003434	5.7157
ZINC01668370	6.1046		ZINC00007254	5.6537
ZINC01747889	5.9233		ZINC00112345	5.2756
ZINC03815446	5.915		ZINC00009687	5.2314
ZINC03815441	5.7864		ZINC00519450	5.2272
ZINC01510316	5.7274		ZINC03997271	5.2244
ZINC03815445	5.5007		ZINC00173989	5.2065
ZINC01566834	5.4204		ZINC03952974	5.1754
ZINC00388660	5.3774		ZINC00225461	5.1533
ZINC01631270	5.3701		ZINC02573673	5.1425
ZINC03815444	5.3405		ZINC01690791	5.1241
ZINC03815448	5.299		ZINC00145938	5.035
ZINC02526173	5.1852		ZINC01279623	5.0338
ZINC00047551	4.9597		ZINC01077309	5.0153
ZINC03815418	4.9107		ZINC00533817	5.0049
ZINC00057656	4.8916		ZINC00519451	4.9946
ZINC00041692	4.8905		ZINC03963807	4.9503
ZINC00113304	4.8498		ZINC00071992	4.8881
ZINC00039316	4.8311		ZINC00005140	4.8511
ZINC00056546	4.8087		ZINC00518961	4.8243
ZINC03815427	4.7778		ZINC00071662	4.8151
ZINC03815417	4.7556		ZINC01281436	4.8146
ZINC02048444	4.6864		ZINC00413717	4.8094
ZINC03812897	4.6794		ZINC02999401	4.8083
ZINC03814410	4.6757		ZINC03849549	4.8033
ZINC03815432	4.6723		ZINC00007345	4.7816
ZINC03815431	4.6514		ZINC03166448	4.7555
ZINC03814364	4.6506		ZINC00107247	4.7502
ZINC03815415	4.6501		ZINC03641076	4.7462
ZINC03815435	4.6268		ZINC03648119	4.7449
ZINC01686128	4.6204		ZINC02484772	4.743
ZINC01999257	4.6106		ZINC03995667	4.7421
ZINC03815439	4.5878		ZINC00057822	4.7378
ZINC03815449	4.5697		ZINC03648153	4.7246
ZINC03815442	4.5663		ZINC02136055	4.704
ZINC03815440	4.5347		ZINC00007287	4.7013
ZINC03815416	4.5058		ZINC03868874	4.6868
ZINC03815437	4.458		ZINC00026300	4.6755
ZINC03815419	4.4451		ZINC02578733	4.6698
ZINC00056434	4.4118		ZINC00006006	4.6647
ZINC01070102	4.3799		ZINC00500205	4.6628
ZINC03815438	4.3568		ZINC00071659	4.6571
ZINC03814383	4.342		ZINC00073643	4.6551
ZINC03815443	4.3285		ZINC02146360	4.6547
ZINC03807917	4.2443		ZINC03166450	4.6504
ZINC03814412	4.1966		ZINC00022584	4.6432
ZINC00001219	4.1963		ZINC03851837	4.6358
ZINC00585979	4.1476		ZINC00246898	4.6307
ZINC00508310	3.9021		ZINC00536277	4.6296
ZINC00283101	3.8977		ZINC02146356	4.6067
ZINC02035359	3.8855		ZINC03648155	4.6043
ZINC03815428	3.8215		ZINC03648136	4.5907
ZINC02106113	3.8131		ZINC01319998	4.5806
ZINC03815429	3.7774		ZINC00268704	4.5761
ZINC01587804	3.7035		ZINC03891594	4.576
ZINC03815421	3.6823		ZINC00416281	4.5751
ZINC03814419	3.6676		ZINC03648127	4.5723
ZINC03814379	3.6339		ZINC00015588	4.5696
ZINC03814415	3.6252		ZINC01666289	4.5686
ZINC03815424	3.4879		ZINC00071990	4.564
ZINC03814416	3.425		ZINC00024487	4.5591
ZINC00155246	3.1162		ZINC01280939	4.5568
ZINC03814361	2.9775		ZINC00935709	4.5514
			ZINC00150675	4.5476
			ZINC00250221	4.5438
			ZINC00003629	4.5374
			ZINC00135905	4.525
			ZINC02641117	4.5239
			ZINC01670243	4.5235
			ZINC03194246	4.5211
			ZINC00561163	4.5201
			ZINC01042172	4.512
			ZINC03648139	4.5096
			ZINC01269839	4.5053
			ZINC00008680	4.5017
			ZINC00608581	4.5013
			ZINC00245783	4.4987
			ZINC03819167	4.4907
			ZINC00012591	4.4893
			ZINC00135894	4.4892
			ZINC03927944	4.4849
			ZINC03858227	4.4806
			ZINC03585126	4.4798
			ZINC00226062	4.4784
			ZINC03648115	4.4612
			ZINC00005569	4.4519
			ZINC00523596	4.4518
			ZINC04235328	4.4436
			ZINC00523597	4.4372
			ZINC04437446	4.4189
			ZINC01041207	4.4139
			ZINC02217534	4.4104
			ZINC01042169	4.4099
			ZINC03867187	4.4071
			ZINC00250266	4.4
			ZINC03311200	4.3984
			ZINC03850583	4.3869
			ZINC01281445	4.3806
			ZINC00024486	4.3762
			ZINC00150939	4.3748
			ZINC02524786	4.3649
			ZINC00539994	4.3626
			ZINC00127670	4.3483
			ZINC00036452	4.3342
			ZINC00241870	4.3321
			ZINC03867001	4.3296
			ZINC00110324	4.3284
			ZINC00507019	4.325
			ZINC00519491	4.3245
			ZINC00124731	4.3188
			ZINC03912587	4.3105
			ZINC00033342	4.3015
			ZINC04416664	4.296
			ZINC03892890	4.2914
			ZINC00338118	4.2889
			ZINC01076057	4.2709
			ZINC03892170	4.2644
			ZINC04465270	4.2644
			ZINC03969325	4.2616
			ZINC00110319	4.2576
			ZINC03890024	4.2462
			ZINC01140399	4.2457
			ZINC03867188	4.2456
			ZINC03892041	4.232
			ZINC00007872	4.2297
			ZINC01464919	4.2225
			ZINC00268708	4.2096
			ZINC03643624	4.2066
			ZINC01576843	4.1768
			ZINC00495239	4.1425
			ZINC04235376	4.1291
			ZINC04466104	4.128
			ZINC03868498	4.128
			ZINC00486129	4.1191
			ZINC00111980	4.1064
			ZINC00474273	4.0953
			ZINC00250259	4.0929
			ZINC00140314	4.0922
			ZINC03892042	4.0917
			ZINC00561955	4.0915
			ZINC03846353	4.088
			ZINC03980304	4.0784
			ZINC00487650	4.0594
			ZINC00033768	4.0464
			ZINC03912081	4.0464
			ZINC03888352	4.046
			ZINC00138773	4.0449
			ZINC03891595	4.0439
			ZINC00148656	4.0364
			ZINC00009661	4.0357
			ZINC04001310	4.0331
			ZINC03619722	4.0329
			ZINC03711154	4.0316
			ZINC03806773	4.0284
			ZINC00000189	4.0253
			ZINC00572494	4.022
			ZINC01666820	4.0017
			ZINC04012477	3.9943
			ZINC03201406	3.9917
			ZINC03220572	3.9911
			ZINC00403003	3.987
			ZINC01054990	3.9811
			ZINC00017354	3.9772
			ZINC02292290	3.976
			ZINC01961566	3.9682
			ZINC01961565	3.9682
			ZINC00411147	3.963
			ZINC04024702	3.9621
			ZINC02512657	3.9591
			ZINC04468290	3.9567
			ZINC03858425	3.9567
			ZINC03704041	3.9554
			ZINC00238473	3.9528
			ZINC03889479	3.9492
			ZINC04467866	3.9468
			ZINC03970916	3.9468
			ZINC00225610	3.9446
			ZINC03975965	3.9443
			ZINC03891774	3.9222
			ZINC04413327	3.9189
			ZINC04469972	3.9175
			ZINC03993213	3.9175
			ZINC03912090	3.9175
			ZINC04470133	3.9098
			ZINC02701585	3.9085
			ZINC03182193	3.9069
			ZINC00024360	3.9052
			ZINC04266959	3.9051
			ZINC00562947	3.9048
			ZINC00268518	3.9014
			ZINC00019492	3.8903
			ZINC02650600	3.8898
			ZINC00297690	3.8791
			ZINC01291411	3.8623
			ZINC00021531	3.86
			ZINC01683226	3.8568
			ZINC00390280	3.8482
			ZINC04007242	3.8458
			ZINC03975967	3.8457
			ZINC00292702	3.8412
			ZINC00130651	3.8392
			ZINC03912122	3.8382
			ZINC03855991	3.8371
			ZINC03194249	3.8344
			ZINC03652769	3.8317
			ZINC03861882	3.8315
			ZINC03706060	3.8314
			ZINC04011561	3.8298
			ZINC00092324	3.8292
			ZINC00052758	3.829
			ZINC00079521	3.829
			ZINC00285876	3.8233
			ZINC00439137	3.8226
			ZINC03701019	3.8153
			ZINC00015584	3.8146
			ZINC00169728	3.8146
			ZINC03997420	3.8139
			ZINC04426137	3.8134
			ZINC02527121	3.8112
			ZINC00235823	3.8111
			ZINC02561669	3.8108
			ZINC00968262	3.8106
			ZINC00443411	3.81
			ZINC00456090	3.8099
			ZINC00008167	3.8085
			ZINC00338553	3.8028
			ZINC00390202	3.802
			ZINC01077308	3.8001
			ZINC00491454	3.7947
			ZINC00225299	3.794
			ZINC01280904	3.7892
			ZINC03912123	3.7886
			ZINC00898027	3.7832
			ZINC03891773	3.7826
			ZINC00419082	3.7806
			ZINC00554965	3.7755
			ZINC00033767	3.7751
			ZINC00132529	3.7709
			ZINC00005909	3.7663
			ZINC03852213	3.7625
			ZINC04470253	3.7608
			ZINC03959122	3.7608
			ZINC00224129	3.7593
			ZINC04234725	3.7575
			ZINC02306420	3.7552
			ZINC00032057	3.7535
			ZINC03905742	3.7499
			ZINC02606577	3.7451
			ZINC00043770	3.7362
			ZINC00044300	3.7345
			ZINC01580906	3.7268
			ZINC03863905	3.7242
			ZINC00477507	3.7204
			ZINC00020337	3.7195
			ZINC03889557	3.7183
			ZINC03867158	3.7175
			ZINC04465462	3.7175
			ZINC00315507	3.7166
			ZINC03890022	3.7166
			ZINC00519490	3.7155
			ZINC00134654	3.7129
			ZINC00390200	3.7116
			ZINC00127005	3.7115
			ZINC03813975	3.7109
			ZINC04104394	3.7089
			ZINC00413699	3.7081
			ZINC03891889	3.7078
			ZINC02482877	3.7054
			ZINC02130508	3.7024
			ZINC01404530	3.7023
			ZINC00232436	3.7015
			ZINC03867211	3.7009
			ZINC00134776	3.6988
			ZINC03858231	3.6948
			ZINC03868323	3.6938
			ZINC00487938	3.6876
			ZINC00078909	3.6836
			ZINC01428555	3.6833
			ZINC00354622	3.6822
			ZINC01620100	3.6812
			ZINC03848076	3.6811
			ZINC00022657	3.6806
			ZINC01433169	3.6737
			ZINC00620798	3.673
			ZINC04465458	3.6696
			ZINC03867154	3.6696
			ZINC00543381	3.666
			ZINC00392984	3.6589
			ZINC00132311	3.6586
			ZINC00009603	3.6498
			ZINC02360726	3.6485
			ZINC03912100	3.6475
			ZINC03891604	3.6457
			ZINC03711229	3.6437
			ZINC00568773	3.6429
			ZINC03198657	3.6415
			ZINC00387859	3.6412
			ZINC01291412	3.6398
			ZINC03199964	3.6357
			ZINC03581786	3.6354
			ZINC03997291	3.6352
			ZINC00094915	3.6333
			ZINC01069200	3.6291
			ZINC02865841	3.629
			ZINC00408148	3.6262
			ZINC00043771	3.6247
			ZINC00024177	3.6235
			ZINC00018239	3.6229
			ZINC04469517	3.6215
			ZINC03974487	3.6215
			ZINC00128048	3.6207
			ZINC00416286	3.6193
			ZINC00621386	3.619
			ZINC00416283	3.6173
			ZINC04317099	3.6171
			ZINC00132527	3.6147
			ZINC03863904	3.6142
			ZINC00140318	3.6129
			ZINC03073069	3.6119
			ZINC00138785	3.6102
			ZINC03891603	3.6087
			ZINC01041069	3.6054
			ZINC03711133	3.6018
			ZINC03868891	3.5989
			ZINC00520224	3.5939
			ZINC00134779	3.5938
			ZINC00088772	3.5934
			ZINC00091194	3.5933
			ZINC00441501	3.5914
			ZINC01663678	3.5906
			ZINC03852165	3.5879
			ZINC01041070	3.5838
			ZINC00194058	3.5814
			ZINC03963923	3.5809
			ZINC03868222	3.5735
			ZINC03868495	3.5735
			ZINC03868187	3.5735
			ZINC04001309	3.5671
			ZINC00440469	3.566
			ZINC00041448	3.5634
			ZINC01663679	3.5602
			ZINC00172332	3.5601
			ZINC00116393	3.5589
			ZINC00354239	3.5573
			ZINC02883628	3.5572
			ZINC04350837	3.552
			ZINC03704569	3.5474
			ZINC00413712	3.5457
			ZINC02439757	3.5427
			ZINC00238764	3.5403
			ZINC03861876	3.5398
			ZINC03704568	3.5334
			ZINC00016008	3.5319
			ZINC03861911	3.5284
			ZINC04031442	3.5275
			ZINC03862417	3.525
			ZINC03701036	3.5223
			ZINC03861937	3.5223
			ZINC03704548	3.5216
			ZINC00126802	3.5215
			ZINC00116297	3.5177
			ZINC00314940	3.5153
			ZINC03868321	3.5138
			ZINC00023042	3.5127
			ZINC00184583	3.5125
			ZINC03952329	3.5108
			ZINC03890725	3.5089
			ZINC03891776	3.5088
			ZINC03863395	3.5082
			ZINC03962055	3.5054
			ZINC00148883	3.5052
			ZINC02502582	3.503
			ZINC00011877	3.5002
			ZINC03711330	3.5001
			ZINC02889052	3.5
			ZINC03912819	3.4981
			ZINC04010331	3.4911
			ZINC00354625	3.4891
			ZINC01678820	3.4852
			ZINC00271980	3.4849
			ZINC00092361	3.4839
			ZINC03963941	3.4836
			ZINC00092370	3.4836
			ZINC00053801	3.4832
			ZINC02918209	3.4813
			ZINC00159164	3.4799
			ZINC04464569	3.4784
			ZINC03980300	3.4784
			ZINC04114861	3.4742
			ZINC01514781	3.4679
			ZINC00083128	3.4665
			ZINC01052190	3.4633
			ZINC00169549	3.4628
			ZINC00272668	3.4596
			ZINC03882740	3.4561
			ZINC00983278	3.4559
			ZINC04131904	3.4553
			ZINC04443785	3.4521
			ZINC03600247	3.4504
			ZINC00317099	3.4503
			ZINC01742864	3.4481
			ZINC03270568	3.4477
			ZINC02580949	3.4448
			ZINC03778005	3.442
			ZINC00085198	3.4417
			ZINC00217349	3.4372
			ZINC02419496	3.4327
			ZINC04498807	3.4301
			ZINC04045945	3.4257
			ZINC03963950	3.425
			ZINC02490261	3.4239
			ZINC03858228	3.4226
			ZINC00121842	3.4201
			ZINC03977652	3.4193
			ZINC00565735	3.4123
			ZINC03889731	3.4087
			ZINC00138891	3.4082
			ZINC00534925	3.4073
			ZINC00223312	3.4057
			ZINC00223334	3.4039
			ZINC01911903	3.4015
			ZINC03998675	3.4011
			ZINC03701028	3.4001
			ZINC00513685	3.3971
			ZINC00386540	3.396
			ZINC00543767	3.3935
			ZINC03787862	3.3886
			ZINC03704661	3.3881
			ZINC00138880	3.3877
			ZINC02549466	3.386
			ZINC03205476	3.385
			ZINC03631036	3.3829
			ZINC03964214	3.3768
			ZINC00235359	3.3716
			ZINC03863071	3.3695
			ZINC00113368	3.369
			ZINC00071531	3.3689
			ZINC01696129	3.3662
			ZINC04317093	3.3647
			ZINC04045947	3.3642
			ZINC03863381	3.364
			ZINC00108286	3.3629
			ZINC00144143	3.3617
			ZINC04251127	3.3615
			ZINC03863221	3.3611
			ZINC00009394	3.3555
			ZINC00094910	3.3486
			ZINC00012482	3.3463
			ZINC02790609	3.3445
			ZINC00008591	3.3432
			ZINC04316910	3.3429
			ZINC00143973	3.3417
			ZINC00075840	3.3406
			ZINC03851252	3.3391
			ZINC03868876	3.3386
			ZINC03892156	3.3343
			ZINC00621387	3.3339
			ZINC03868880	3.3298
			ZINC00280652	3.3296
			ZINC00123261	3.3293
			ZINC00014171	3.3293
			ZINC03868881	3.3288
			ZINC00054550	3.3288
			ZINC00199651	3.3285
			ZINC00229627	3.3285
			ZINC00104422	3.3285
			ZINC02423385	3.327
			ZINC00563784	3.3269
			ZINC00034149	3.3231
			ZINC03963934	3.3182
			ZINC03963939	3.3173
			ZINC01016455	3.3143
			ZINC03889373	3.3131
			ZINC03862452	3.3117
			ZINC03868887	3.31
			ZINC00093526	3.3089
			ZINC04095457	3.3084
			ZINC00469488	3.3068
			ZINC02490270	3.302
			ZINC03855990	3.301
			ZINC01053687	3.298
			ZINC04245274	3.297
			ZINC03962117	3.2956
			ZINC03715970	3.2901
			ZINC04245307	3.2883
			ZINC00288555	3.2788
			ZINC03863763	3.2785
			ZINC03862416	3.2782
			ZINC00280240	3.2768
			ZINC00026164	3.2764
			ZINC03704559	3.2758
			ZINC00504692	3.2751
			ZINC03704590	3.2743
			ZINC00169221	3.2727
			ZINC04576942	3.272
			ZINC03857060	3.2716
			ZINC00036749	3.2712
			ZINC03866931	3.271
			ZINC03711332	3.2694
			ZINC03956474	3.268
			ZINC04084789	3.2586
			ZINC03960801	3.2576
			ZINC03165963	3.2519
			ZINC00387861	3.249
			ZINC00387860	3.2483
			ZINC00172324	3.2452
			ZINC03949689	3.2442
			ZINC02131344	3.2417
			ZINC03970837	3.2401
			ZINC03862419	3.24
			ZINC04418194	3.2399
			ZINC03862391	3.2397
			ZINC02419495	3.2391
			ZINC03704574	3.2385
			ZINC03858879	3.2371
			ZINC04052857	3.236
			ZINC01654061	3.2337
			ZINC03956441	3.232
			ZINC00501131	3.2315
			ZINC04045166	3.2311
			ZINC04484684	3.2307
			ZINC02452061	3.2298
			ZINC03861881	3.2289
			ZINC03805109	3.2278
			ZINC03863323	3.2271
			ZINC00279800	3.2264
			ZINC00464494	3.2248
			ZINC02009400	3.2245
			ZINC04066451	3.2215
			ZINC00026384	3.2179
			ZINC03861912	3.2157
			ZINC02597436	3.2116
			ZINC03851020	3.2104
			ZINC03861870	3.2089
			ZINC00331931	3.2065
			ZINC03887063	3.2056
			ZINC02473887	3.2055
			ZINC03246319	3.2052
			ZINC03972165	3.2034
			ZINC03698281	3.2011
			ZINC00510125	3.2005
			ZINC00573451	3.1997
			ZINC03198588	3.1923
			ZINC03956502	3.192
			ZINC00125584	3.1916
			ZINC00000934	3.1894
			ZINC03319694	3.1848
			ZINC03973862	3.1827
			ZINC00383792	3.1808
			ZINC03705708	3.1797
			ZINC03863745	3.1796
			ZINC03902335	3.1793
			ZINC00227435	3.1774
			ZINC00405331	3.1762
			ZINC00061998	3.1758
			ZINC00575575	3.1757
			ZINC03868879	3.1752
			ZINC03239532	3.174
			ZINC00215530	3.174
			ZINC03861873	3.1655
			ZINC04011518	3.1651
			ZINC04021979	3.1637
			ZINC03862420	3.1613
			ZINC03852836	3.1608
			ZINC03857921	3.1574
			ZINC00492807	3.1548
			ZINC00110547	3.1514
			ZINC03972174	3.1504
			ZINC04323933	3.1496
			ZINC01100919	3.1463
			ZINC01536948	3.142
			ZINC00036530	3.1417
			ZINC03958082	3.1374
			ZINC03698250	3.1364
			ZINC04193893	3.1341
			ZINC03890095	3.1316
			ZINC04316909	3.1315
			ZINC03468921	3.1311
			ZINC03304263	3.1311
			ZINC03233025	3.131
			ZINC00307652	3.131
			ZINC03850705	3.1283
			ZINC01595661	3.1247
			ZINC03706340	3.122
			ZINC04426130	3.1205
			ZINC01275347	3.1204
			ZINC01320283	3.1203
			ZINC00033888	3.1181
			ZINC00127903	3.1147
			ZINC03891014	3.1143
			ZINC00246737	3.111
			ZINC01554458	3.1103
			ZINC03853945	3.1103
			ZINC03944815	3.1092
			ZINC03196581	3.1087
			ZINC01636366	3.1085
			ZINC01536668	3.1082
			ZINC01840706	3.1077
			ZINC03868884	3.1072
			ZINC00184584	3.1067
			ZINC03862418	3.1036
			ZINC03858229	3.1002
			ZINC04470117	3.1002
			ZINC03057133	3.0982
			ZINC03861874	3.0979
			ZINC00280330	3.0942
			ZINC00279868	3.0942
			ZINC00024362	3.0905
			ZINC00443515	3.0888
			ZINC00076968	3.0886
			ZINC03704575	3.0861
			ZINC03273246	3.0779
			ZINC00083255	3.0741
			ZINC00020300	3.0733
			ZINC03852771	3.0732
			ZINC00234806	3.0721
			ZINC00485402	3.0692
			ZINC01384954	3.069
			ZINC03698282	3.0661
			ZINC00387862	3.0659
			ZINC00227773	3.0646
			ZINC03851218	3.0634
			ZINC00250228	3.0619
			ZINC03848978	3.0609
			ZINC02562057	3.0583
			ZINC02231288	3.058
			ZINC00280313	3.0567
			ZINC03868890	3.054
			ZINC00224610	3.053
			ZINC04288772	3.0505
			ZINC03817448	3.0498
			ZINC03817444	3.0493
			ZINC00374072	3.0467
			ZINC00133196	3.0466
			ZINC00185159	3.046
			ZINC00556007	3.0455
			ZINC03862151	3.0443
			ZINC00026419	3.0435
			ZINC00556008	3.0435
			ZINC03862293	3.0431
			ZINC00026416	3.0425
			ZINC00556009	3.0418
			ZINC04312943	3.0407
			ZINC00556010	3.0401
			ZINC03201888	3.0387
			ZINC03156920	3.038
			ZINC03668721	3.0327
			ZINC03890726	3.0312
			ZINC00339978	3.0268
			ZINC03861883	3.0262
			ZINC00213463	3.0257
			ZINC02534952	3.0251
			ZINC03866910	3.0249
			ZINC03862848	3.0247
			ZINC00122971	3.0235
			ZINC02659985	3.0222
			ZINC03863011	3.022
			ZINC03418718	3.0217
			ZINC03701017	3.0207
			ZINC01094836	3.0207
			ZINC03868882	3.0175
			ZINC03861869	3.0156
			ZINC00534256	3.0135
			ZINC03963912	3.0104
			ZINC03963037	3.009
			ZINC03892093	3.0086
			ZINC00245828	3.0072
			ZINC00243533	3.0036
			ZINC03862849	3.0035
			ZINC04054541	3.003
			ZINC00293945	3.0003
			ZINC00134652	2.9984
			ZINC03850676	2.9969
			ZINC00415535	2.9943
			ZINC00478414	2.9937
			ZINC03862064	2.9935
			ZINC00175943	2.9933
			ZINC00185169	2.9928
			ZINC00262378	2.9918
			ZINC00246653	2.9914
			ZINC00347452	2.9908
			ZINC03891611	2.9901
			ZINC03963929	2.99
			ZINC01575059	2.9897
			ZINC03701034	2.9894
			ZINC01100920	2.9889
			ZINC03345294	2.9884
			ZINC04414705	2.9879
			ZINC03885633	2.9855
			ZINC00414588	2.9852
			ZINC01281437	2.9846
			ZINC03619825	2.9832
			ZINC03619635	2.9826
			ZINC03853948	2.9805
			ZINC00398505	2.9803
			ZINC00006959	2.9798
			ZINC02891271	2.979
			ZINC03868452	2.9745
			ZINC03868497	2.9745
			ZINC00563049	2.9744
			ZINC03355400	2.9742
			ZINC03396904	2.9742
			ZINC00074973	2.974
			ZINC03355401	2.9739
			ZINC03396907	2.9731
			ZINC03858024	2.9715
			ZINC00390238	2.9712
			ZINC00534618	2.9711
			ZINC00263280	2.9699
			ZINC02173032	2.9694
			ZINC03394127	2.969
			ZINC03970838	2.9677
			ZINC03997278	2.9674
			ZINC03861875	2.9656
			ZINC03852854	2.9652
			ZINC03572944	2.9651
			ZINC00238763	2.9647
			ZINC01017493	2.9631
			ZINC03701869	2.9627
			ZINC04147175	2.9624
			ZINC02327096	2.962
			ZINC03850712	2.9618
			ZINC00297668	2.9612
			ZINC03889530	2.9609
			ZINC00023395	2.9607
			ZINC01639322	2.9605
			ZINC03889532	2.9594
			ZINC01456701	2.9592
			ZINC03862019	2.9591
			ZINC04439727	2.9582
			ZINC03862521	2.9582
			ZINC03963876	2.9581
			ZINC03698280	2.9578
			ZINC03868322	2.9573
			ZINC00258914	2.9573
			ZINC03878696	2.9573
			ZINC03963904	2.9568
			ZINC00342721	2.9567
			ZINC00561361	2.9567
			ZINC02584871	2.9567
			ZINC03616230	2.9567
			ZINC01252115	2.9566
			ZINC03157856	2.9563
			ZINC04441320	2.9538
			ZINC03468913	2.9528
			ZINC03304260	2.9528
			ZINC03233024	2.9528
			ZINC00551476	2.9527
			ZINC00423030	2.9514
			ZINC04139348	2.9505
			ZINC02504446	2.9499
			ZINC03854573	2.9498
			ZINC04441339	2.9496
			ZINC03902342	2.9493
			ZINC03915640	2.9488
			ZINC01476740	2.9487
			ZINC00269450	2.9485
			ZINC03962070	2.9482
			ZINC03078614	2.948
			ZINC00086101	2.9477
			ZINC00230495	2.9466
			ZINC00427639	2.9461
			ZINC00013024	2.9459
			ZINC03868607	2.945
			ZINC01318904	2.9427
			ZINC00544238	2.9414
			ZINC03867760	2.9408
			ZINC02558512	2.9406
			ZINC04465735	2.9404
			ZINC03867761	2.9404
			ZINC02558531	2.9403
			ZINC04633728	2.9403
			ZINC00043980	2.9402
			ZINC00360098	2.9395
			ZINC00027212	2.9379
			ZINC00311393	2.9375
			ZINC03889768	2.9371
			ZINC03974999	2.9369
			ZINC02550491	2.9367
			ZINC03857437	2.9366
			ZINC00386458	2.9354
			ZINC02584877	2.935
			ZINC00385818	2.935
			ZINC02760792	2.9347
			ZINC01292227	2.9336
			ZINC04490978	2.9335
			ZINC00062228	2.9326
			ZINC00045734	2.9325
			ZINC02783103	2.9323
			ZINC02777400	2.9322
			ZINC03855970	2.9318
			ZINC04023848	2.9318
			ZINC02294558	2.9313
			ZINC03853328	2.9305
			ZINC04445616	2.9304
			ZINC00452607	2.9298
			ZINC04030688	2.9295
			ZINC00297090	2.9264
			ZINC00036531	2.9257
			ZINC04104321	2.9245
			ZINC00257145	2.9243
			ZINC00318172	2.9235
			ZINC03861829	2.9233
			ZINC00565750	2.923
			ZINC03866716	2.9224
			ZINC03855047	2.9224
			ZINC00390467	2.9223
			ZINC00265802	2.9215
			ZINC00178238	2.9202
			ZINC04136967	2.9201
			ZINC00009379	2.9201
			ZINC00104724	2.9197
			ZINC00104765	2.9193
			ZINC00104760	2.9193
			ZINC00036523	2.9189
			ZINC02509821	2.9189
			ZINC03802112	2.918
			ZINC03890335	2.9179
			ZINC01126443	2.9174
			ZINC00436013	2.9172
			ZINC02481994	2.9163
			ZINC03863941	2.9156
			ZINC03809953	2.9153
			ZINC03853405	2.9146
			ZINC02223055	2.914
			ZINC04046285	2.9138
			ZINC03890604	2.9132
			ZINC04465063	2.9132
			ZINC02362916	2.913
			ZINC02202278	2.913
			ZINC00227333	2.9128
			ZINC03863289	2.9125
			ZINC00059434	2.9122
			ZINC00074892	2.9121
			ZINC04317092	2.9118
			ZINC00556032	2.9104
			ZINC00380387	2.9103
			ZINC04627846	2.9102
			ZINC02576980	2.909
			ZINC03944975	2.9085
			ZINC00023116	2.9079
			ZINC00580369	2.9077
			ZINC01027997	2.9075
			ZINC00476754	2.9072
			ZINC03867424	2.9058
			ZINC03963895	2.9057
			ZINC00524370	2.9056
			ZINC03853943	2.9053
			ZINC03963228	2.9048
			ZINC03987446	2.9044
			ZINC03695689	2.9043
			ZINC00191197	2.9039
			ZINC02148553	2.9034
			ZINC00283151	2.9029
			ZINC03356061	2.9026
			ZINC00339976	2.9024
			ZINC04000726	2.9018
			ZINC00381509	2.9012
			ZINC00476230	2.9012
			ZINC04129069	2.9008
			ZINC01993830	2.8992
			ZINC04227359	2.8983
			ZINC02750522	2.8973
			ZINC04632807	2.897
			ZINC03584608	2.897
			ZINC03590134	2.8961
			ZINC00305185	2.896
			ZINC03476460	2.896
			ZINC00519667	2.8959
			ZINC00277992	2.8959
			ZINC00228351	2.8959
			ZINC00381510	2.8959
			ZINC00434183	2.8958
			ZINC00228272	2.8958
			ZINC04136953	2.8956
			ZINC00179241	2.8954
			ZINC00314066	2.8954
			ZINC00565333	2.8936
			ZINC00565335	2.8936
			ZINC03890985	2.893
			ZINC00226379	2.8916
			ZINC00213316	2.8913
			ZINC03851251	2.8913
			ZINC03268080	2.8912
			ZINC03863965	2.8906
			ZINC03868889	2.8901
			ZINC00572493	2.8899
			ZINC04114008	2.889
			ZINC00086178	2.8889
			ZINC00021711	2.8888
			ZINC02777395	2.8879
			ZINC03820698	2.8879
			ZINC03820700	2.8879
			ZINC03891789	2.8876
			ZINC00339983	2.8875
			ZINC02130571	2.8871
			ZINC03243939	2.8867
			ZINC03257891	2.8867
			ZINC01056452	2.8866
			ZINC00247015	2.8863
			ZINC00550351	2.8863
			ZINC03912094	2.8858
			ZINC00339980	2.8856
			ZINC00483922	2.8855
			ZINC04177102	2.8851
			ZINC02546668	2.8849
			ZINC02026520	2.8847
			ZINC00001503	2.8831
			ZINC00519579	2.8829
			ZINC00433715	2.8827
			ZINC00035651	2.8827
			ZINC03967658	2.8824
			ZINC04466101	2.8824
			ZINC03967620	2.8822
			ZINC04465946	2.8822
			ZINC04465937	2.8817
			ZINC03967617	2.8817
			ZINC00045738	2.881
			ZINC03963552	2.8805
			ZINC03863701	2.8802
			ZINC03949691	2.8795
			ZINC00184724	2.8791
			ZINC03868885	2.8782
			ZINC04139377	2.8769
			ZINC00007756	2.8766
			ZINC01876582	2.8761
			ZINC03853947	2.876
			ZINC03868883	2.8758
			ZINC03975208	2.8748
			ZINC00483921	2.8747
			ZINC00284075	2.8741
			ZINC00125104	2.8741
			ZINC00265805	2.8736
			ZINC02474999	2.8733
			ZINC00025512	2.8725
			ZINC03853950	2.8725
			ZINC00413675	2.8725
			ZINC00436528	2.8725
			ZINC00032149	2.8722
			ZINC03890097	2.8721
			ZINC03899187	2.8713
			ZINC00386224	2.8707
			ZINC00413697	2.8706
			ZINC03396901	2.8706
			ZINC03355399	2.8706
			ZINC00413684	2.8703
			ZINC03209699	2.8698
			ZINC03862171	2.8691
			ZINC04368351	2.869
			ZINC00090665	2.8688
			ZINC00194013	2.8685
			ZINC03862797	2.8677
			ZINC03963957	2.8668
			ZINC02161451	2.8663
			ZINC02939083	2.8655
			ZINC00004619	2.8653
			ZINC00208671	2.8652
			ZINC03863357	2.865
			ZINC00234811	2.8647
			ZINC00224260	2.8645
			ZINC00179164	2.8641
			ZINC03849556	2.8638
			ZINC02364744	2.8635
			ZINC02330094	2.8635
			ZINC02432839	2.8634
			ZINC03194363	2.8631
			ZINC03233625	2.8631
			ZINC03209521	2.8624
			ZINC03856290	2.8621
			ZINC00420824	2.861
			ZINC03241272	2.8609
			ZINC00227433	2.8607
			ZINC00302078	2.8598
			ZINC03239531	2.8595
			ZINC02359546	2.8592
			ZINC03241273	2.8592
			ZINC02360727	2.8584
			ZINC02875050	2.8579
			ZINC03233630	2.8571
			ZINC00098047	2.8563
			ZINC02811176	2.856
			ZINC02022863	2.8555
			ZINC00103432	2.8554
			ZINC03868892	2.855
			ZINC00390350	2.855
			ZINC03968602	2.8548
			ZINC02789187	2.8548
			ZINC02099412	2.8547
			ZINC00062229	2.8529
			ZINC02336994	2.8528
			ZINC02213867	2.8528
			ZINC03889197	2.8527
			ZINC03867654	2.8523
			ZINC03868413	2.8523
			ZINC03887961	2.8523
			ZINC00036522	2.8511
			ZINC03974922	2.851
			ZINC00508501	2.8493
			ZINC00435701	2.8492
			ZINC00485084	2.8492
			ZINC04405328	2.849
			ZINC04001281	2.8489
			ZINC03866974	2.8482
			ZINC00137178	2.847
			ZINC03891627	2.847
			ZINC03861910	2.8456
			ZINC03972183	2.8456
			ZINC04470350	2.8456
			ZINC03233702	2.8451
			ZINC00264282	2.8443
			ZINC00273511	2.8441
			ZINC00539308	2.844
			ZINC03868608	2.8439
			ZINC00416285	2.8426
			ZINC00868863	2.8424
			ZINC02210173	2.8408
			ZINC03868350	2.8405
			ZINC04443288	2.8404
			ZINC02584887	2.8394
			ZINC00194767	2.839
			ZINC03862520	2.8388
			ZINC00008269	2.8386
			ZINC03613804	2.838
			ZINC01181126	2.8379
			ZINC00186075	2.837
			ZINC00257180	2.8366
			ZINC00229918	2.8358
			ZINC00009653	2.8335
			ZINC01993844	2.8328
			ZINC00089835	2.8324
			ZINC01054102	2.8319
			ZINC03957527	2.8316
			ZINC03867425	2.8316
			ZINC03546588	2.8308
			ZINC03836286	2.8307
			ZINC00503365	2.8304
			ZINC03463306	2.8302
			ZINC00556033	2.8294
			ZINC03898183	2.8291
			ZINC00868864	2.8289
			ZINC00513288	2.8287
			ZINC00442789	2.8285
			ZINC00437597	2.8281
			ZINC00236108	2.8279
			ZINC00437811	2.8275
			ZINC03452729	2.8275
			ZINC04469584	2.8268
			ZINC03912082	2.8268
			ZINC00023114	2.8266
			ZINC02333569	2.826
			ZINC00542920	2.826
			ZINC00437295	2.8255
			ZINC03853944	2.8254
			ZINC00018758	2.8248
			ZINC00501370	2.8243
			ZINC02502234	2.824
			ZINC00323862	2.824
			ZINC00016716	2.8238
			ZINC02347439	2.8218
			ZINC02161454	2.8213
			ZINC00121839	2.8209
			ZINC03862990	2.8207
			ZINC02294557	2.8206
			ZINC00130638	2.8202
			ZINC00974831	2.8199
			ZINC04003811	2.8196
			ZINC02162373	2.8184
			ZINC04125498	2.818
			ZINC00366655	2.8175
			ZINC02597429	2.8174
			ZINC03858620	2.8161
			ZINC00581215	2.8148
			ZINC00128602	2.8144
			ZINC00167632	2.8144
			ZINC00148912	2.8125
			ZINC00008950	2.812
			ZINC03185350	2.8116
			ZINC00339977	2.8104
			ZINC00234809	2.8099
			ZINC04300899	2.8074
			ZINC00275194	2.8072
			ZINC02535865	2.8072
			ZINC03270427	2.8067
			ZINC00042653	2.8067
			ZINC04488647	2.8063
			ZINC03711302	2.8055
			ZINC00034146	2.8055
			ZINC01699583	2.8054
			ZINC03968609	2.8048
			ZINC00831904	2.8047
			ZINC03661716	2.8042
			ZINC03471464	2.8042
			ZINC01399719	2.8039
			ZINC00186475	2.8026
			ZINC03889103	2.8014
			ZINC00226846	2.8014
			ZINC00213488	2.7999
			ZINC04138128	2.7998
			ZINC03962434	2.7988
			ZINC00234816	2.7973
			ZINC00389943	2.7966
			ZINC00192127	2.7963
			ZINC00177986	2.7961
			ZINC00011787	2.7959
			ZINC02819819	2.7955
			ZINC00501945	2.7938
			ZINC00433585	2.7937
			ZINC02529411	2.7936
			ZINC04118124	2.7919
			ZINC01586846	2.7901
			ZINC00586216	2.7884
			ZINC01677173	2.7878
			ZINC00523352	2.7872
			ZINC03482000	2.7867
			ZINC02400223	2.7865
			ZINC02026515	2.7861
			ZINC03846131	2.786
			ZINC03867453	2.7858
			ZINC00293942	2.7854
			ZINC01682044	2.7851
			ZINC04030205	2.784
			ZINC00520762	2.7826
			ZINC01757351	2.7812
			ZINC03862065	2.781
			ZINC00513684	2.7808
			ZINC03233626	2.7802
			ZINC02236712	2.78
			ZINC00311467	2.78
			ZINC01518999	2.7795
			ZINC03859315	2.7795
			ZINC02524319	2.7792
			ZINC02481049	2.7774
			ZINC03956414	2.7773
			ZINC03863700	2.7772
			ZINC03388867	2.7771
			ZINC00023041	2.777
			ZINC04466091	2.775
			ZINC03868474	2.775
			ZINC03233703	2.7747
			ZINC02750523	2.7746
			ZINC03580562	2.7743
			ZINC03698273	2.773
			ZINC02843196	2.7725
			ZINC00112038	2.7716
			ZINC03963908	2.7711
			ZINC04111523	2.771
			ZINC00230498	2.7706
			ZINC00230496	2.7705
			ZINC01626331	2.7704
			ZINC03352358	2.7698
			ZINC03963936	2.7697
			ZINC00229083	2.7695
			ZINC00226425	2.7686
			ZINC00505704	2.7682
			ZINC00173761	2.767
			ZINC03288034	2.765
			ZINC03580539	2.7648
			ZINC03862142	2.7638
			ZINC04465985	2.7637
			ZINC03868328	2.7637
			ZINC03853737	2.7622
			ZINC00387281	2.7597
			ZINC00621552	2.7594
			ZINC03868893	2.7581
			ZINC02104894	2.7571
			ZINC03903640	2.7559
			ZINC00613887	2.7554
			ZINC00565733	2.7551
			ZINC04121849	2.7548
			ZINC00004624	2.7547
			ZINC03972166	2.7527
			ZINC00038746	2.7524
			ZINC00133325	2.7519
			ZINC00452350	2.7515
			ZINC00416658	2.7507
			ZINC03230700	2.7503
			ZINC00393543	2.7474
			ZINC02079717	2.7471
			ZINC00336612	2.7469
			ZINC03867426	2.7468
			ZINC03396910	2.7454
			ZINC00432670	2.7453
			ZINC03963873	2.745
			ZINC03868351	2.7433
			ZINC00071757	2.7429
			ZINC00023046	2.7427
			ZINC03863893	2.7411
			ZINC03862796	2.7411
			ZINC00011761	2.7404
			ZINC03280829	2.74
			ZINC00282386	2.7392
			ZINC02452888	2.7383
			ZINC03957585	2.7381
			ZINC03874005	2.7379
			ZINC00016144	2.7353
			ZINC04217587	2.7351
			ZINC00002834	2.7347
			ZINC03969763	2.7346
			ZINC00280009	2.734
			ZINC03854572	2.734
			ZINC00451771	2.7335
			ZINC03855064	2.7333
			ZINC00093895	2.7321
			ZINC00400425	2.7318
			ZINC03590135	2.7317
			ZINC00130354	2.7316
			ZINC02685706	2.7311
			ZINC00239709	2.7302
			ZINC03706039	2.7297
			ZINC03868875	2.7265
			ZINC03349880	2.726
			ZINC00569081	2.7241
			ZINC03889602	2.7227
			ZINC03355404	2.7226
			ZINC04627845	2.7218
			ZINC02535329	2.7215
			ZINC00357998	2.7214
			ZINC02438608	2.7208
			ZINC01410464	2.7196
			ZINC04036395	2.719
			ZINC02327583	2.7185
			ZINC00437528	2.7176
			ZINC02782960	2.7173
			ZINC03289680	2.7171
			ZINC04293333	2.7155
			ZINC00236112	2.7154
			ZINC03889189	2.7139
			ZINC03917924	2.7133
			ZINC00312965	2.7114
			ZINC04093701	2.7111
			ZINC03329605	2.7106
			ZINC01501442	2.7101
			ZINC02796081	2.7097
			ZINC01036277	2.7094
			ZINC01630593	2.7094
			ZINC00199617	2.7092
			ZINC02550132	2.7089
			ZINC00305188	2.7084
			ZINC00063606	2.7075
			ZINC00566642	2.7071
			ZINC03963938	2.7069
			ZINC03853525	2.706
			ZINC00537955	2.7058
			ZINC00182337	2.705
			ZINC00487022	2.7044
			ZINC00538861	2.7014
			ZINC00543192	2.7014
			ZINC01792360	2.7014
			ZINC00538840	2.7014
			ZINC03859198	2.7013
			ZINC03778012	2.7009
			ZINC00502312	2.6996
			ZINC01247845	2.6984
			ZINC03862640	2.6984
			ZINC04117622	2.6971
			ZINC04084803	2.6971
			ZINC00082450	2.697
			ZINC04299240	2.6967
			ZINC03962400	2.6961
			ZINC02528970	2.6957
			ZINC00075320	2.6942
			ZINC00082478	2.694
			ZINC04177114	2.6936
			ZINC03479014	2.6928
			ZINC03566417	2.6926
			ZINC00002832	2.6921
			ZINC03016439	2.6901
			ZINC00099105	2.6895
			ZINC03569979	2.6894
			ZINC00106400	2.6888
			ZINC01744290	2.6888
			ZINC03890798	2.6878
			ZINC03318814	2.6877
			ZINC04419755	2.6874
			ZINC03868067	2.6857
			ZINC00358181	2.6855
			ZINC00466494	2.6848
			ZINC00033273	2.6842
			ZINC00151809	2.6842
			ZINC03796900	2.6832
			ZINC01613570	2.6804
			ZINC03352363	2.6793
			ZINC03612965	2.6792
			ZINC00020022	2.6791
			ZINC03033062	2.6779
			ZINC00111791	2.6776
			ZINC03440755	2.6765
			ZINC03912567	2.6758
			ZINC00510907	2.6748
			ZINC00611730	2.6746
			ZINC03890563	2.6741
			ZINC04094697	2.6737
			ZINC00269608	2.6726
			ZINC00054232	2.6715
			ZINC03396406	2.6699
			ZINC03233624	2.6688
			ZINC03890018	2.668
			ZINC03891550	2.6669
			ZINC00339979	2.6648
			ZINC00523239	2.663
			ZINC03030641	2.6626
			ZINC00246384	2.6622
			ZINC00092695	2.6609
			ZINC00482797	2.6603
			ZINC03912645	2.6596
			ZINC00019790	2.6592
			ZINC03889080	2.6589
			ZINC00259547	2.6583
			ZINC02558500	2.6563
			ZINC03434681	2.6555
			ZINC03853524	2.6555
			ZINC02534972	2.6554
			ZINC00367848	2.6552
			ZINC03848643	2.6536
			ZINC00390822	2.6505
			ZINC00974832	2.6499
			ZINC00067440	2.6487
			ZINC03963905	2.647
			ZINC00297326	2.6469
			ZINC01504755	2.6461
			ZINC02558529	2.6425
			ZINC00244673	2.6423
			ZINC02330112	2.642
			ZINC00172006	2.6415
			ZINC00136818	2.6389
			ZINC03955272	2.6382
			ZINC00588445	2.6379
			ZINC00374521	2.6359
			ZINC03646570	2.6356
			ZINC00432423	2.6338
			ZINC00041939	2.6337
			ZINC00186631	2.6335
			ZINC01616861	2.6321
			ZINC00392507	2.6319
			ZINC01507835	2.6319
			ZINC00579979	2.6319
			ZINC00184134	2.6319
			ZINC00375044	2.6316
			ZINC03598522	2.6284
			ZINC02543468	2.6275
			ZINC01410002	2.6274
			ZINC01446484	2.6267
			ZINC00235311	2.6261
			ZINC03874293	2.6234
			ZINC03853942	2.6232
			ZINC03850792	2.623
			ZINC03505438	2.6223
			ZINC03868886	2.6217
			ZINC00230012	2.6216
			ZINC00258382	2.6213
			ZINC00002614	2.6212
			ZINC03379538	2.62
			ZINC00445513	2.6195
			ZINC00514644	2.6194
			ZINC00011293	2.6193
			ZINC04235099	2.6191
			ZINC03868068	2.619
			ZINC03868878	2.6181
			ZINC04053914	2.6176
			ZINC03609376	2.6157
			ZINC03868894	2.6142
			ZINC02739080	2.6132
			ZINC03998897	2.613
			ZINC00111884	2.6124
			ZINC03093817	2.6123
			ZINC00502655	2.6109
			ZINC03962706	2.6109
			ZINC00501752	2.6109
			ZINC00502653	2.6104
			ZINC03962648	2.6104
			ZINC00501750	2.6104
			ZINC00055651	2.6104
			ZINC03971488	2.6099
			ZINC03867215	2.6099
			ZINC00482802	2.6082
			ZINC00300577	2.6068
			ZINC02506009	2.6065
			ZINC00246386	2.6052
			ZINC03974925	2.6047
			ZINC03890263	2.6045
			ZINC03977594	2.6045
			ZINC02169638	2.6037
			ZINC01658350	2.6031
			ZINC01281434	2.6024
			ZINC02904129	2.6024
			ZINC00022646	2.6016
			ZINC02729603	2.6011
			ZINC00272602	2.6008
			ZINC00392237	2.6001
			ZINC00561810	2.5996
			ZINC01394939	2.5992
			ZINC00501522	2.598
			ZINC00271538	2.5967
			ZINC00084629	2.5955
			ZINC03817440	2.5951
			ZINC00164865	2.5941
			ZINC03968652	2.592
			ZINC01880250	2.5915
			ZINC00127258	2.5904
			ZINC00510393	2.5882
			ZINC03968674	2.5877
			ZINC03262357	2.5874
			ZINC00130309	2.5872
			ZINC00346712	2.5869
			ZINC03845596	2.5853
			ZINC02720595	2.5835
			ZINC00420811	2.5813
			ZINC00102978	2.5801
			ZINC00112541	2.5792
			ZINC00009328	2.5792
			ZINC01924075	2.5783
			ZINC01621240	2.5781
			ZINC03863536	2.5736
			ZINC03890049	2.5727
			ZINC03861813	2.5716
			ZINC00010950	2.5712
			ZINC00133881	2.5712
			ZINC00313435	2.5688
			ZINC04441609	2.5674
			ZINC03305469	2.5644
			ZINC00194603	2.5628
			ZINC00225343	2.5623
			ZINC02785278	2.5605
			ZINC00503366	2.5598
			ZINC04003655	2.5585
			ZINC00034144	2.5585
			ZINC02558527	2.5574
			ZINC00565630	2.557
			ZINC02742536	2.5558
			ZINC02453043	2.5557
			ZINC03863843	2.5548
			ZINC03968753	2.5522
			ZINC03890623	2.552
			ZINC04093831	2.5516
			ZINC03858386	2.5514
			ZINC03973577	2.5511
			ZINC03868877	2.5511
			ZINC03975000	2.5509
			ZINC03861936	2.549
			ZINC02627803	2.5486
			ZINC03853619	2.5483
			ZINC02179591	2.5479
			ZINC00556031	2.5475
			ZINC01279320	2.5473
			ZINC03891002	2.5472
			ZINC00272680	2.5459
			ZINC03958436	2.5458
			ZINC00544530	2.5456
			ZINC00213324	2.5452
			ZINC00038124	2.544
			ZINC03990121	2.5435
			ZINC00289653	2.5423
			ZINC00994227	2.5423
			ZINC00257645	2.5381
			ZINC03890549	2.538
			ZINC00055848	2.5376
			ZINC00505712	2.5328
			ZINC00583042	2.5322
			ZINC03974923	2.5308
			ZINC00558003	2.5275
			ZINC00279792	2.5264
			ZINC03867544	2.5256
			ZINC00428763	2.5239
			ZINC03968434	2.5239
			ZINC00580874	2.5225
			ZINC00300674	2.5224
			ZINC03968433	2.5222
			ZINC00300945	2.5221
			ZINC00008170	2.5216
			ZINC03866924	2.5207
			ZINC00111829	2.5202
			ZINC02790608	2.5176
			ZINC00012150	2.5163
			ZINC02741472	2.5161
			ZINC01506209	2.5158
			ZINC00210799	2.5148
			ZINC00351100	2.5141
			ZINC03902340	2.5136
			ZINC04094698	2.5125
			ZINC02903255	2.512
			ZINC00565640	2.5112
			ZINC00341188	2.5109
			ZINC00341187	2.5109
			ZINC01519000	2.5102
			ZINC00023047	2.5095
			ZINC00088513	2.5086
			ZINC00228227	2.5085
			ZINC03861816	2.5078
			ZINC00026786	2.5063
			ZINC03532447	2.5032
			ZINC01446485	2.5022
			ZINC00433606	2.5007
			ZINC03968762	2.4998
			ZINC04135833	2.4955
			ZINC00510906	2.4928
			ZINC01472305	2.4922
			ZINC03890043	2.4914
			ZINC00596101	2.4909
			ZINC04390362	2.4902
			ZINC00137198	2.4888
			ZINC00022651	2.4877
			ZINC04360485	2.4874
			ZINC03890045	2.4841
			ZINC00505728	2.4833
			ZINC00004404	2.4819
			ZINC00186643	2.4814
			ZINC00181868	2.481
			ZINC00556030	2.4802
			ZINC03956453	2.4751
			ZINC01629654	2.4745
			ZINC03971624	2.4734
			ZINC04116089	2.4718
			ZINC00280320	2.471
			ZINC00586211	2.4698
			ZINC00179289	2.4682
			ZINC02431617	2.4678
			ZINC00166050	2.4675
			ZINC01399032	2.4669
			ZINC03868035	2.4662
			ZINC04275810	2.4648
			ZINC00123258	2.4641
			ZINC00136675	2.4632
			ZINC00003728	2.4632
			ZINC04294191	2.4625
			ZINC00063604	2.4623
			ZINC03862842	2.462
			ZINC00038744	2.4611
			ZINC03880449	2.459
			ZINC04338732	2.4589
			ZINC00549762	2.4588
			ZINC00555999	2.4563
			ZINC00556000	2.4562
			ZINC03861933	2.456
			ZINC03861885	2.4559
			ZINC02737954	2.4557
			ZINC01569660	2.4557
			ZINC02534955	2.4534
			ZINC03922122	2.452
			ZINC00054337	2.4507
			ZINC00043901	2.4489
			ZINC00232969	2.4488
			ZINC00342644	2.4481
			ZINC03591896	2.4478
			ZINC02950611	2.4385
			ZINC02720596	2.4384
			ZINC00501132	2.436
			ZINC02506006	2.4349
			ZINC00541301	2.434
			ZINC00817982	2.4302
			ZINC04607984	2.4293
			ZINC02763750	2.4261
			ZINC03609924	2.4235
			ZINC00580091	2.4217
			ZINC00389470	2.4173
			ZINC03559027	2.4172
			ZINC00565650	2.4159
			ZINC03977653	2.4143
			ZINC03861830	2.4133
			ZINC03968761	2.4132
			ZINC03959140	2.4104
			ZINC01470617	2.4097
			ZINC02561986	2.4084
			ZINC00436303	2.4076
			ZINC02689943	2.4075
			ZINC00122729	2.4059
			ZINC03990124	2.4049
			ZINC03145349	2.4037
			ZINC03961119	2.4028
			ZINC00296603	2.4013
			ZINC02790623	2.4005
			ZINC00558005	2.3978
			ZINC03043069	2.3956
			ZINC03043061	2.395
			ZINC00482806	2.3942
			ZINC03958220	2.3929
			ZINC00012908	2.3901
			ZINC03151515	2.3896
			ZINC00126697	2.3893
			ZINC00111788	2.3846
			ZINC01585780	2.3836
			ZINC00398617	2.3829
			ZINC03340262	2.3829
			ZINC03580564	2.3821
			ZINC03862803	2.3816
			ZINC01446486	2.3767
			ZINC00011780	2.3758
			ZINC00565651	2.3742
			ZINC04501924	2.3714
			ZINC01612041	2.3697
			ZINC02534899	2.3678
			ZINC00020469	2.366
			ZINC01398321	2.3653
			ZINC02767146	2.3646
			ZINC03546810	2.3613
			ZINC02685704	2.3609
			ZINC01620388	2.3608
			ZINC03778001	2.3607
			ZINC00279589	2.3607
			ZINC00038430	2.3582
			ZINC04627852	2.3558
			ZINC00194010	2.3555
			ZINC04594809	2.3553
			ZINC03778009	2.355
			ZINC01859746	2.351
			ZINC03249699	2.3476
			ZINC03102059	2.3473
			ZINC02567739	2.3464
			ZINC00127328	2.3441
			ZINC04183653	2.3433
			ZINC00003978	2.3433
			ZINC04302682	2.3429
			ZINC02543369	2.3427
			ZINC00337522	2.3424
			ZINC00127870	2.342
			ZINC01196454	2.3414
			ZINC00524371	2.3413
			ZINC03890261	2.34
			ZINC00342723	2.3387
			ZINC00297106	2.3372
			ZINC02575559	2.3367
			ZINC01542777	2.3346
			ZINC00007265	2.3297
			ZINC02035552	2.3289
			ZINC03890444	2.3277
			ZINC00084632	2.3271
			ZINC00562973	2.3268
			ZINC02755350	2.3267
			ZINC00287363	2.3258
			ZINC01922532	2.3242
			ZINC02315488	2.3224
			ZINC03883463	2.3214
			ZINC02806599	2.3208
			ZINC00407239	2.3173
			ZINC03859217	2.317
			ZINC00250236	2.314
			ZINC03446655	2.3134
			ZINC00386529	2.313
			ZINC00556002	2.3123
			ZINC00229322	2.3064
			ZINC02628040	2.304
			ZINC04107371	2.3039
			ZINC02157878	2.3035
			ZINC00022647	2.3034
			ZINC03853736	2.3012
			ZINC02833281	2.2993
			ZINC00463755	2.2981
			ZINC00447748	2.2967
			ZINC00311200	2.2965
			ZINC03473372	2.2964
			ZINC00484450	2.2964
			ZINC00373926	2.2962
			ZINC02720594	2.2916
			ZINC03833048	2.2831
			ZINC00463525	2.2829
			ZINC00486064	2.2805
			ZINC01924071	2.2804
			ZINC03574681	2.28
			ZINC00495351	2.2781
			ZINC03902359	2.2763
			ZINC04444273	2.276
			ZINC02738013	2.2751
			ZINC03955270	2.2711
			ZINC02345165	2.2703
			ZINC02754011	2.2674
			ZINC01598745	2.2674
			ZINC03852826	2.2672
			ZINC02534916	2.2652
			ZINC00613470	2.2594
			ZINC00090076	2.2594
			ZINC03213384	2.2583
			ZINC03779780	2.2559
			ZINC00071155	2.2547
			ZINC02818370	2.251
			ZINC00556001	2.2507
			ZINC02813806	2.2492
			ZINC04135874	2.2484
			ZINC03977698	2.2452
			ZINC03863290	2.2438
			ZINC00387810	2.2418
			ZINC03233620	2.2402
			ZINC03440753	2.2384
			ZINC00270572	2.2355
			ZINC04466167	2.2267
			ZINC03868596	2.2267
			ZINC01150238	2.2261
			ZINC02079715	2.2245
			ZINC02738012	2.2215
			ZINC02534941	2.2199
			ZINC04392005	2.2185
			ZINC00150676	2.2132
			ZINC00022649	2.2104
			ZINC00809344	2.2091
			ZINC02854968	2.2084
			ZINC04528708	2.2072
			ZINC02737934	2.206
			ZINC00157026	2.2051
			ZINC02737933	2.2041
			ZINC01422183	2.2012
			ZINC01922552	2.2006
			ZINC04465906	2.1976
			ZINC03868037	2.1976
			ZINC00229272	2.1929
			ZINC00025365	2.1914
			ZINC02385470	2.1867
			ZINC04015227	2.186
			ZINC00071730	2.1802
			ZINC00161107	2.1792
			ZINC03852765	2.1728
			ZINC02387600	2.1714
			ZINC00152683	2.1705
			ZINC01402582	2.1693
			ZINC00513296	2.1672
			ZINC00257868	2.1662
			ZINC03867208	2.1645
			ZINC00165974	2.1618
			ZINC03892157	2.1603
			ZINC00346288	2.1588
			ZINC03868185	2.1573
			ZINC00210340	2.1461
			ZINC01422182	2.1425
			ZINC03853949	2.1419
			ZINC00291349	2.1395
			ZINC03487542	2.1372
			ZINC00072899	2.1353
			ZINC01459882	2.134
			ZINC02645358	2.1306
			ZINC00452658	2.1285
			ZINC04333021	2.1251
			ZINC03547621	2.1238
			ZINC02435371	2.1177
			ZINC02689941	2.116
			ZINC02545374	2.115
			ZINC00486185	2.1126
			ZINC03574662	2.1121
			ZINC00282372	2.1086
			ZINC00099109	2.1081
			ZINC03362560	2.1076
			ZINC03250408	2.107
			ZINC03890986	2.1065
			ZINC00583021	2.1018
			ZINC00520032	2.1016
			ZINC04352527	2.1005
			ZINC00424540	2.099
			ZINC03698226	2.0975
			ZINC00502932	2.0939
			ZINC01754793	2.09
			ZINC00233102	2.0846
			ZINC01500903	2.084
			ZINC00049314	2.0828
			ZINC02541465	2.0802
			ZINC00311482	2.0795
			ZINC02263982	2.0793
			ZINC04364903	2.0784
			ZINC00583790	2.0759
			ZINC02200057	2.075
			ZINC02134976	2.074
			ZINC00061402	2.0729
			ZINC02179592	2.0723
			ZINC03862237	2.0698
			ZINC03980039	2.0692
			ZINC00300950	2.0628
			ZINC02534829	2.059
			ZINC00252220	2.0512
			ZINC00191620	2.0479
			ZINC00210209	2.0353
			ZINC03558988	2.0132
			ZINC00485689	2.0123
			ZINC02354761	2.0073
			ZINC03883435	2.0063
			ZINC03351615	2.0056
			ZINC03853398	2.0032
			ZINC03526474	1.9986
			ZINC00428764	1.9882
			ZINC03962425	1.988
			ZINC00428762	1.9866
			ZINC04268527	1.985
			ZINC02534956	1.9834
			ZINC02645085	1.9793
			ZINC03852815	1.9753
			ZINC03961129	1.9713
			ZINC00063026	1.9668
			ZINC03877847	1.9639
			ZINC03343072	1.9602
			ZINC00257739	1.958
			ZINC02342407	1.9548
			ZINC04465936	1.9532
			ZINC03868186	1.9532
			ZINC02464434	1.9477
			ZINC00367771	1.9446
			ZINC00365447	1.9438
			ZINC01881588	1.9433
			ZINC02510611	1.9415
			ZINC00104740	1.9355
			ZINC00565717	1.935
			ZINC03574645	1.9328
			ZINC00100029	1.9315
			ZINC03853446	1.9313
			ZINC00204006	1.9296
			ZINC04464598	1.928
			ZINC03857827	1.928
			ZINC01708605	1.926
			ZINC00217234	1.9259
			ZINC00383791	1.9227
			ZINC00383790	1.9173
			ZINC00036815	1.9149
			ZINC03891997	1.9136
			ZINC03857826	1.9129
			ZINC00207253	1.9126
			ZINC03199353	1.9058
			ZINC03351617	1.9046
			ZINC03889697	1.9041
			ZINC03968673	1.8984
			ZINC00429497	1.8969
			ZINC00068857	1.8968
			ZINC00441601	1.8956
			ZINC00330819	1.8947
			ZINC00209577	1.8926
			ZINC03852923	1.8919
			ZINC00438899	1.8914
			ZINC01055040	1.8899
			ZINC00114537	1.8893
			ZINC00565631	1.8867
			ZINC02223200	1.8863
			ZINC01446487	1.8862
			ZINC00565716	1.8847
			ZINC03987653	1.8677
			ZINC00297109	1.8584
			ZINC00368040	1.8557
			ZINC00071496	1.8553
			ZINC00178800	1.8551
			ZINC04039942	1.8506
			ZINC01627515	1.8471
			ZINC02464572	1.8463
			ZINC01542529	1.8436
			ZINC02665136	1.8426
			ZINC00091248	1.842
			ZINC00362700	1.842
			ZINC01410003	1.83
			ZINC00128817	1.8281
			ZINC03859218	1.8235
			ZINC03853447	1.8224
			ZINC03188821	1.8217
			ZINC03194076	1.8163
			ZINC02534843	1.8078
			ZINC01459881	1.8076
			ZINC03185136	1.8055
